# Supplementary material
Source: PubMed Central journal article supplement (PMC4295809)

# Supporting Information for

## **Functionalized Poly(3-hexylthiophene)s via Lithium-Bromine Exchange**

Byungjin Koo,<sup>1,2</sup> Ellen M. Sletten,<sup>1</sup> and Timothy M. Swager<sup>1,\*</sup>

<sup>1</sup>Department of Chemistry and <sup>2</sup>Department of Materials Science and Engineering,  
Massachusetts Institute of Technology, Cambridge, Massachusetts 02139, United States

\*Correspondence to: T. M. Swager (E-mail: tswager@mit.edu)

### **Contents**

|                                                        |     |
|--------------------------------------------------------|-----|
| Characterization.....                                  | S2  |
| Control Experiments with <i>n</i> -Butyl Bromide ..... | S6  |
| Cyclic Voltammetry Data .....                          | S9  |
| Gel Permeation Chromatography Traces .....             | S10 |
| <sup>1</sup> H and <sup>19</sup> F NMR Spectra.....    | S14 |
| IR Spectra .....                                       | S35 |

## Characterization

**Data for poly(3-bromo-4-hexylthiophene) (1).** After following the previous literature (Li, Y.; Vamvounis, G.; Holdcroft, S. *Macromolecules* **2001**, 34, 141-143), yellow polymer was obtained with 99% yield based on 100% bromination. Four different batches of Br-P3HTs were used throughout the paper. #1 (33,000 g/mol,  $M_w/M_n = 2.05$ , starting from commercial P3HT with 41,000 g/mol,  $M_w/M_n = 2.16$ ), #2 (27,000 g/mol,  $M_w/M_n = 1.82$ , starting from commercial P3HT with 28,000 g/mol,  $M_w/M_n = 1.86$ ), #3 (26,000 g/mol,  $M_w/M_n = 1.80$ , starting from commercial P3HT with 28,000 g/mol,  $M_w/M_n = 1.86$ ), and #4 (39,000 g/mol,  $M_w/M_n = 1.99$ , starting from commercial P3HT with 33,000 g/mol,  $M_w/M_n = 2.03$ ). Anal. Calcd for  $C_{10}H_{13}BrS$  (#4): C, 48.99; H, 5.34; Br, 32.59; S, 13.08. Found: C, 48.38; H, 5.09; N, 0.38; Br, 33.40; S, 12.35.

**Data for poly[(3-hexylthiophene)-*ran*-(3-bromo-4-hexylthiophene)] (3a).** Starting from Br-P3HT #3 (30 mg,  $M_n$  26,000 g/mol,  $M_w/M_n = 1.80$ ) and using methanol (excess) as an electrophile, **3a** was obtained (14.4 mg, average repeat unit molecular weight 187.58 g/mol, 62 % yield). GPC:  $M_n$  15,000 g/mol,  $M_w/M_n = 3.01$ ;  $^1H$  NMR (400 MHz,  $CDCl_3$ ):  $\delta$  7.04–6.98 (m, 0.73H), 2.86–2.62 (bm, 2H), 1.69 (bm, 2H), 1.43–1.28 (bm, 6H), 0.91 (bm, 3H); IR ( $cm^{-1}$ ): 1726 (C-Br), 1458 (thiophene); Anal. Calcd for  $C_{10}H_{14}S$ : C, 72.23; H, 8.49; S, 19.28. Calcd for  $C_{10}H_{13}BrS$ : C, 48.99; H, 5.34; Br, 32.59; S, 13.08. Found: C, 66.33; H, 7.43; N, 0.39; Br, 6.65; S, 16.69.

**Data for poly[(3-hexylthiophene)-*ran*-(3-bromo-4-hexylthiophene)] (3b).** Starting from Br-P3HT #3 (30 mg,  $M_n$  26,000 g/mol,  $M_w/M_n = 1.80$ ) and using methanol (excess) as an electrophile, **3b** was obtained (16.5 mg, average repeat unit molecular weight 172.59 g/mol, 78 % yield). GPC:  $M_n$  28,000 g/mol,  $M_w/M_n = 9.43$ ;  $^1H$  NMR (400 MHz,  $CDCl_3$ ):  $\delta$  6.98 (s, 0.92H), 2.81–2.57 (bm, 2H), 1.71 (bm, 2H), 1.44–1.35 (bm, 6H), 0.91 (bm, 3H); IR ( $cm^{-1}$ ): 1725 (C-Br), 1463 (thiophene); Anal. Calcd for  $C_{10}H_{14}S$ : C, 72.23; H, 8.49; S, 19.28. Calcd for  $C_{10}H_{13}BrS$ : C, 48.99; H, 5.34; Br, 32.59; S, 13.08. Found: C, 71.06; H, 8.33; N, 0.27; Br, 1.02; S, 16.92.

**Data for poly[(3-hexylthiophene)-*ran*-(3-bromo-4-hexylthiophene)] (3c).** Starting from Br-P3HT #3 (30 mg,  $M_n$  26,000 g/mol,  $M_w/M_n = 1.80$ ) and using methanol (excess) as an electrophile, **3c** was obtained (17.9 mg, average repeat unit molecular weight 171.01 g/mol, 86 % yield). GPC:  $M_n$  41,000 g/mol,  $M_w/M_n = 7.39$ ;  $^1H$  NMR (400 MHz,  $CDCl_3$ ):  $\delta$  6.98 (s, 0.94H), 2.81–2.57 (bm, 2H), 1.71 (bm, 2H), 1.44–1.35 (bm, 6H), 0.91 (bm, 3H); IR ( $cm^{-1}$ ): 1725 (C-Br), 1464 (thiophene); Anal. Calcd for  $C_{10}H_{14}S$ : C, 72.23; H, 8.49; S, 19.28. Calcd for  $C_{10}H_{13}BrS$ : C, 48.99; H, 5.34; Br, 32.59; S, 13.08. Found: C, 71.57; H, 8.59; N, < 0.02; Br, 0.64; S, 17.53.

**Data for poly[(3-hexylthiophene)-*ran*-(3-bromo-4-hexylthiophene)] (3d).** Starting from Br-P3HT #3 (30 mg,  $M_n$  26,000 g/mol,  $M_w/M_n = 1.80$ ) and using methanol (excess) as an electrophile, **3d** was obtained (18.9 mg, average repeat unit molecular weight 169.44 g/mol, 91 % yield). GPC:  $M_n$  24,000 g/mol,  $M_w/M_n = 13.4$ ;  $^1H$  NMR (400 MHz,  $CDCl_3$ ):  $\delta$  6.98 (s, 0.96H), 2.81–2.57 (bm, 2H), 1.71 (bm, 2H), 1.44–1.35 (bm, 6H), 0.91 (bm, 3H); IR ( $cm^{-1}$ ): 1726 (C-Br), 1464 (thiophene); Anal. Calcd for  $C_{10}H_{14}S$ : C, 72.23; H, 8.49; S, 19.28. Calcd for  $C_{10}H_{13}BrS$ : C, 48.99; H, 5.34; Br, 32.59; S, 13.08. Found: C, 71.53; H, 8.27; N, 0.39; Br, 0.42; S, 17.38.

**Data for poly[(3-hexylthiophene)-*ran*-(3-bromo-4-hexylthiophene)-*ran*-(3-hexylthiophene-4-*d*)] (4).** Starting from Br-P3HT #2 (30 mg,  $M_n$  27,000 g/mol,  $M_w/M_n = 1.82$ ) and using methanol- $d_4$  (excess) as

an electrophile, **4** was obtained (average repeat unit molecular weight 171.72 g/mol).  $^1\text{H}$  NMR (400 MHz,  $\text{CDCl}_3$ ):  $\delta$  6.98 (s, 0.24H), 2.81–2.57 (bm, 2H), 1.71 (bm, 2H), 1.44–1.35 (bm, 6H), 0.92 (bm, 3H).

**Data for poly[(3-hexylthiophene)-*ran*-(3-bromo-4-hexylthiophene)-*ran*-(1-(4-hexylthiophen-3-yl)ethan-1-one)] (5).** Starting from Br-P3HT #2 (30 mg,  $M_n$  27,000 g/mol,  $M_w/M_n = 1.82$ ) and using acetic anhydride (10 eq., 0.116 mL) as an electrophile, **5** was obtained (26.0 mg, average repeat unit molecular weight 196.24 g/mol, quantitative yield). GPC:  $M_n$  22,000 g/mol,  $M_w/M_n = 3.86$ ;  $^1\text{H}$  NMR (400 MHz,  $\text{CDCl}_3$ ):  $\delta$  7.06–7.00 (bm, 0.34H), 2.81–2.56 (bm, 2H), 2.21 (bs, 1.81H), 1.68 (bm, 2H), 1.41–1.31 (bm, 6H), 0.87 (bm, 3H); IR ( $\text{cm}^{-1}$ ): 1686 (carbonyl), 1458 (thiophene); UV-vis ( $\text{CH}_2\text{Cl}_2$ ):  $\lambda_{\text{max}}$  277, 379 nm; Fluorescence ( $\text{CH}_2\text{Cl}_2$ ):  $\lambda_{\text{max}}$  549 nm (Ex. 350 nm).

**Data for poly[(3-hexylthiophene)-*ran*-(3-bromo-4-hexylthiophene)-*ran*-(1-(4-hexylthiophen-3-yl)hexan-1-one)] (6).** Starting from Br-P3HT #1 (30 mg,  $M_n$  33,000 g/mol,  $M_w/M_n = 2.05$ ) and using hexanoic anhydride (10 eq., 0.28 mL) as an electrophile, **6** was obtained (27.7 mg, average repeat unit molecular weight 231.46 g/mol, 98% yield). GPC:  $M_n$  64,000 g/mol,  $M_w/M_n = 3.13$ ;  $^1\text{H}$  NMR (400 MHz,  $\text{CDCl}_3$ ):  $\delta$  7.04–6.98 (bm, 0.33H), 2.78–2.56 (bm, 2H), 2.44–2.28 (bm, 1.28H), 1.68–1.54 (bm), 1.39–1.28 (bm), 0.87–0.86 (bm); IR ( $\text{cm}^{-1}$ ): 1688 (carbonyl), 1464 (thiophene); UV-vis ( $\text{CH}_2\text{Cl}_2$ ):  $\lambda_{\text{max}}$  256, 386 nm; Fluorescence ( $\text{CH}_2\text{Cl}_2$ ):  $\lambda_{\text{max}}$  551 nm (Ex. 350 nm).

**Data for poly[(3-hexylthiophene)-*ran*-(3-bromo-4-hexylthiophene)-*ran*-(1-(4-hexylthiophen-3-yl)-3-methylbutan-1-one)] (7).** Starting from Br-P3HT #1 (30 mg,  $M_n$  33,000 g/mol,  $M_w/M_n = 2.05$ ) and using isovaleric anhydride (10 eq., 0.245 mL) as an electrophile, **7** was obtained (27.3 mg, average repeat unit molecular weight 220.59 g/mol, quantitative yield). GPC:  $M_n$  64,000 g/mol,  $M_w/M_n = 2.35$ ;  $^1\text{H}$  NMR (400 MHz,  $\text{CDCl}_3$ ):  $\delta$  7.04–6.98 (bm, 0.35H), 2.77–2.60 (bm, 2H), 2.34–2.33 (bm, 1.16H), 2.10 (bm), 1.68–1.58 (bm, 2H), 1.42–1.27 (bm), 0.85–0.83 (bm); IR ( $\text{cm}^{-1}$ ): 1688 (carbonyl), 1465 (thiophene); UV-vis ( $\text{CH}_2\text{Cl}_2$ ):  $\lambda_{\text{max}}$  387 nm; Fluorescence ( $\text{CH}_2\text{Cl}_2$ ):  $\lambda_{\text{max}}$  554 nm (Ex. 350 nm).

**Data for poly[(3-hexylthiophene)-*ran*-(3-bromo-4-hexylthiophene)-*ran*-(2,2,2-trifluoro-1-(4-hexylthiophen-3-yl)ethan-1-one)] (8).** Starting from Br-P3HT #1 (31.1 mg,  $M_n$  33,000 g/mol,  $M_w/M_n = 2.05$ ) and using trifluoroacetic anhydride (10 eq., 0.176 mL) as an electrophile, **8** was obtained (28.7 mg, average repeat unit molecular weight 220.87 g/mol, quantitative yield). GPC:  $M_n$  33,000 g/mol,  $M_w/M_n = 5.50$ ;  $^1\text{H}$  NMR (400 MHz,  $\text{CDCl}_3$ ):  $\delta$  7.07–6.99 (bm, 0.41H), 2.76–2.60 (bm, 2H), 1.68–1.60 (bm, 2H), 1.41–1.29 (bm, 6H), 0.88 (bm, 3H);  $^{19}\text{F}$  NMR (376 MHz,  $\text{CDCl}_3$ ):  $\delta$  -74.38 (bm); IR ( $\text{cm}^{-1}$ ): 1798 (carbonyl), 1202 ( $\text{CF}_3$ ), 1157 ( $\text{CF}_3$ ); UV-vis ( $\text{CH}_2\text{Cl}_2$ ):  $\lambda_{\text{max}}$  278, 387 nm; Fluorescence ( $\text{CH}_2\text{Cl}_2$ ):  $\lambda_{\text{max}}$  576 nm (Ex. 350 nm); Anal. Calcd for  $\text{C}_{10}\text{H}_{14}\text{S}$ : C, 72.23; H, 8.49; S, 19.28. Calcd for  $\text{C}_{10}\text{H}_{13}\text{BrS}$ : C, 48.99; H, 5.34; Br, 32.59; S, 13.08. Calcd for  $\text{C}_{12}\text{H}_{13}\text{F}_3\text{OS}$ : C, 54.95; H, 5.00; F, 21.73; O, 6.10; S, 12.22. Found: C, 59.88; H, 6.12; N, < 0.02; Br, 3.55; F, 11.67; S, 13.62.

**Data for poly[(3-hexylthiophene)-*ran*-(3-bromo-4-hexylthiophene)-*ran*-(4-hexylthiophen-3-yl)(phenyl)methanone)] (9).** Starting from Br-P3HT #1 (30 mg,  $M_n$  33,000 g/mol,  $M_w/M_n = 2.05$ ) and using benzoic anhydride (10 eq., 277 mg pre-dissolved in 1 mL THF) as an electrophile, **9** was obtained (25.6 mg, average repeat unit molecular weight 230.39 g/mol, 91% yield). GPC:  $M_n$  55,000 g/mol,  $M_w/M_n = 2.04$ ;  $^1\text{H}$  NMR (400 MHz,  $\text{CDCl}_3$ ):  $\delta$  7.78–7.32 (bm, 2.69H), 6.98–6.73 (bm, 0.36H), 2.80–2.29 (bm, 2H), 1.68–1.51 (bm, 2H), 1.40–1.19 (bm, 6H), 0.90–0.82 (bm, 3H); IR ( $\text{cm}^{-1}$ ): 1663 (carbonyl), 1597 (phenyl), 1449 (thiophene); UV-vis ( $\text{CH}_2\text{Cl}_2$ ):  $\lambda_{\text{max}}$  250, 279, 397 nm; Fluorescence ( $\text{CH}_2\text{Cl}_2$ ):  $\lambda_{\text{max}}$  562 nm (Ex. 360 nm).

**Data for poly[(3-hexylthiophene)-*ran*-(3-bromo-4-hexylthiophene)-*ran*-((4-hexylthiophen-3-yl)(p-tolyl)methanone)] (10).** Starting from Br-P3HT #1 (30 mg,  $M_n$  33,000 g/mol,  $M_w/M_n = 2.05$ ) using 4-methylbenzoic anhydride (10 eq., 311 mg pre-dissolved in 1 mL THF) as an electrophile, **10** was obtained (30.5 mg, average repeat unit molecular weight 238.35 g/mol based on  $x = 0.37$ ,  $y = 0.06$ ,  $z = 0.57$ , quantitative yield). GPC:  $M_n$  62,000 g/mol,  $M_w/M_n = 1.83$ ;  $^1\text{H NMR}$  (400 MHz,  $\text{CDCl}_3$ ):  $\delta$  7.68–7.05 (bm), 6.98–6.75 (bm, 0.37H), 2.79–2.33 (bm), 1.70–1.10 (bm, 8H), 0.90–0.81 (bm, 3H); IR ( $\text{cm}^{-1}$ ): 1660 (carbonyl), 1605 (phenyl), 1457 (thiophene); UV-vis ( $\text{CH}_2\text{Cl}_2$ ):  $\lambda_{\text{max}}$  266, 390 nm; Fluorescence ( $\text{CH}_2\text{Cl}_2$ ):  $\lambda_{\text{max}}$  566 nm (Ex. 360 nm).

**Data for poly[(3-hexylthiophene)-*ran*-(3-bromo-4-hexylthiophene)-*ran*-((4-hexylthiophen-3-yl)(4-methoxyphenyl)methanone)] (11).** Starting from Br-P3HT #1 (30 mg,  $M_n$  33,000 g/mol,  $M_w/M_n = 2.05$ ) and using 4-methoxybenzoic anhydride (10eq., 350 mg pre-dissolved in 1 mL THF) as an electrophile, **11** was obtained (31.1 mg, average repeat unit molecular weight 259.78 g/mol, 98% yield). GPC:  $M_n$  63,000 g/mol,  $M_w/M_n = 1.84$ ;  $^1\text{H NMR}$  (400 MHz,  $\text{CDCl}_3$ ):  $\delta$  7.78 (bm, 0.65H), 7.41 (bm, 0.65H), 6.97 (bm, 0.27H), 6.80 (bm, 1.30H), 3.82 (bs, 1.94H), 2.79–2.33 (bm, 2H), 1.68–1.17 (bm, 8H), 0.89–0.81 (bm, 3H); IR ( $\text{cm}^{-1}$ ): 1655 (carbonyl), 1598 (methoxy phenyl), 1509 (methoxy phenyl), 1460 (thiophene); UV-vis ( $\text{CH}_2\text{Cl}_2$ ):  $\lambda_{\text{max}}$  286, 397 nm; Fluorescence ( $\text{CH}_2\text{Cl}_2$ ):  $\lambda_{\text{max}}$  557 nm (Ex. 365 nm).

**Data for poly[(3-hexylthiophene)-*ran*-(3-bromo-4-hexylthiophene)-*ran*-(1-(4-hexylthiophen-3-yl)butan-1-ol)] (12).** Starting from Br-P3HT #2 (30 mg,  $M_n$  27,000 g/mol,  $M_w/M_n = 1.82$ ) and using butyraldehyde (10eq., 0.11 mL) as an electrophile, **12** was obtained (22.5 mg, average repeat unit molecular weight 216.47 g/mol, 85% yield). GPC:  $M_n$  18,000 g/mol,  $M_w/M_n = 4.19$ ;  $^1\text{H NMR}$  (400 MHz,  $\text{CDCl}_3$ ):  $\delta$  7.03 (bm, 0.32H), 4.78 (bm, 0.51H), 2.92–2.54 (bm, 2H), 1.88 (bm, 1.02H), 1.69–1.31 (bm, 9.02H), 0.88 (bm, 4.53H); IR ( $\text{cm}^{-1}$ ): 3436 (hydroxyl), 1464 (thiophene); UV-vis ( $\text{CHCl}_3$ ):  $\lambda_{\text{max}}$  258, 360 nm; Fluorescence ( $\text{CHCl}_3$ ):  $\lambda_{\text{max}}$  536 nm (Ex. 330 nm).

**Data for poly[(3-hexylthiophene)-*ran*-(3-bromo-4-hexylthiophene)-*ran*-((4-hexylthiophen-3-yl)(4-methoxyphenyl)methanol)] (13).** Starting from Br-P3HT #1 (30 mg,  $M_n$  33,000 g/mol,  $M_w/M_n = 2.05$ ) and using 4-methoxybenzaldehyde (10 eq., 0.15 mL) as an electrophile, **13** was obtained (26.6 mg, average repeat unit molecular weight 256.00 g/mol, 85% yield). GPC:  $M_n$  57,000 g/mol,  $M_w/M_n = 4.24$ ;  $^1\text{H NMR}$  (400 MHz,  $\text{CDCl}_3$ ):  $\delta$  7.20 (bm), 6.97 (bm, 0.32H), 6.82 (bm), 5.94 (bs), 3.84 (bs), 3.77 (bm), 2.75–2.27 (bm, 2H), 1.65–1.04 (bm, 8H), 0.86–0.81 (bm, 3H); IR ( $\text{cm}^{-1}$ ): 3497 (hydroxyl), 1599 (methoxy phenyl), 1510 (methoxy phenyl), 1463 (thiophene); UV-vis ( $\text{CH}_2\text{Cl}_2$ ):  $\lambda_{\text{max}}$  276, 297, 349 nm; Fluorescence ( $\text{CH}_2\text{Cl}_2$ ):  $\lambda_{\text{max}}$  532 nm (Ex. 335 nm).

**Data for poly[(3-hexylthiophene)-*ran*-(3-bromo-4-hexylthiophene)-*ran*-((4-hexylthiophen-3-yl)(5-methylfuran-2-yl)methanol)] (14).** Starting from Br-P3HT #2 (30 mg,  $M_n$  27,000 g/mol,  $M_w/M_n = 1.82$ ) and using 5-methylfurfural (10 eq., 0.12 mL) as an electrophile, **14** was obtained (31 mg, average repeat unit molecular weight 232.53 g/mol, quantitative yield). GPC:  $M_n$  14,000 g/mol,  $M_w/M_n = 1.99$ ;  $^1\text{H NMR}$  (400 MHz,  $\text{CDCl}_3$ ):  $\delta$  6.98–6.88 (bm, 0.37H), 6.04–5.59 (bm), 2.79–2.35 (bm, 2H), 2.26 (bs), 1.67–1.24 (bm, 8H), 0.86 (bm, 3H); IR ( $\text{cm}^{-1}$ ): 3445 (hydroxyl), 1684 (furan), 1511 (furan), 1458 (thiophene).

**Data for poly[(3-hexylthiophene)-*ran*-(3-bromo-4-hexylthiophene)-*ran*-((4-hexylthiophen-3-yl)trimethylsilane)] (15).** Starting from Br-P3HT #1 (30 mg,  $M_n$  33,000 g/mol,  $M_w/M_n = 2.05$ ) and using trimethylsilyl chloride (10 eq., 0.155 mL) as an electrophile, **15** was obtained (20.8 mg, average repeat

unit molecular weight 212.02 g/mol, 80% yield). GPC:  $M_n$  32,000 g/mol,  $M_w/M_n = 5.83$ ;  $^1\text{H NMR}$  (400 MHz,  $\text{CDCl}_3$ ):  $\delta$  6.96 (bs, 0.37H), 2.85–2.50 (bm, 2H), 1.68–1.58 (bm, 2H), 1.41–1.28 (bm, 6H), 0.87 (bm, 3H), 0.16 (bm); IR ( $\text{cm}^{-1}$ ): 1465 (thiophene), 837 (Si-C).

**Data for poly[(3-hexylthiophene)-*ran*-(3-bromo-4-hexylthiophene)-*ran*-(3-fluoro-4-hexylthiophene)] (16).** Starting from Br-P3HT #3 (30 mg,  $M_n$  26,000 g/mol,  $M_w/M_n = 1.80$ ) and using *N*-fluorobenzenesulfonimide (10 eq., 0.386 mg pre-dissolved in 2 mL THF), **16** was obtained (22 mg, average repeat unit molecular weight 180.70 g/mol, 99% yield). GPC:  $M_n$  17,000 g/mol,  $M_w/M_n = 1.47$ ;  $^1\text{H NMR}$  (400 MHz,  $\text{CDCl}_3$ ):  $\delta$  7.02 (bm, 0.30H), 2.79–2.59 (bm, 2H), 1.65 (bm, 2H), 1.40–1.33 (bm, 6H), 0.90 (bm, 3H);  $^{19}\text{F NMR}$  (376 MHz,  $\text{CDCl}_3$ ):  $\delta$  -123.60 (bs); IR ( $\text{cm}^{-1}$ ): 1464 (thiophene); UV-vis ( $\text{CHCl}_3$ ):  $\lambda_{\text{max}}$  266, 419 nm; UV-vis (thin film):  $\lambda_{\text{max}}$  491 nm; Fluorescence ( $\text{CHCl}_3$ ):  $\lambda_{\text{max}}$  554 nm (Ex. 380 nm); Anal. Calcd for  $\text{C}_{10}\text{H}_{14}\text{S}$ : C, 72.23; H, 8.49; S, 19.28. Calcd for  $\text{C}_{10}\text{H}_{13}\text{BrS}$ : C, 48.99; H, 5.34; Br, 32.59; S, 13.08. Calcd for  $\text{C}_{10}\text{H}_{13}\text{FS}$ : C, 65.18; H, 7.11; F, 10.31; S, 17.40. Found: C, 60.19; H, 6.56; N, 0.64; Br, 1.11; F, 8.81; S, 14.57.

**Data for poly[(3-hexylthiophene)-*ran*-(3-bromo-4-hexylthiophene)-*ran*-(3-azido-4-hexylthiophene)] (17).** Starting from Br-P3HT #2 (30 mg,  $M_n$  27,000 g/mol,  $M_w/M_n = 1.82$ ) and using *p*-toluenesulfonyl azide solution (11–15 % (w/w) in toluene, 10 eq., 2.06 mL added based on the assumption of 13 % (w/w) in toluene) as an electrophile, followed by either glacial acetic acid (10 eq., 0.068 mL) or HCl (10 eq., 3 M, 0.4 mL) quenching, **17** was obtained (29.1 mg from HCl quenching). IR ( $\text{cm}^{-1}$ ): 2105 (azide), 1457 (thiophene). As a result of acidic workup and excess tosyl azide, hydrazoic acid might be formed, and thus, cautions need to be taken. When a large reaction scale needs to be performed, aqueous workup can also be carried out, according to the literature (Gavenonis, J.; Tilley, T. D. *Organometallics* **2002**, 21, 5549–5563).

**Data for poly[(3-hexylthiophene)-*ran*-(3-bromo-4-hexylthiophene)-*ran*-(1-(4-hexylthiophen-3-yl)-4-(phenoxymethyl)-1*H*-1,2,3-triazole)] (18).** Starting from the crude mixture of **17** (12.7 mg) with AcOH quenching, **18** was obtained (24 mg). IR ( $\text{cm}^{-1}$ ): 1599 (triazole), 1494 (phenyl), 1457 (thiophene).

**Data for poly[(3-hexylthiophene)-*ran*-(3-bromo-4-hexylthiophene)-*ran*-(4,4-difluoro-3-(4-hexylthiophen-3-yl)-4,5,6,7-tetrahydro-3*H*-benzo[3,4]cycloocta[1,2-*d*][1,2,3]triazole)] (19).** Starting from Br-P3HT #2 (30 mg,  $M_n$  27,000 g/mol,  $M_w/M_n = 1.82$ ), the crude mixture of **17** was obtained, then difluorobenzocyclooctyne (**20**) was added to the mixture, resulting in **19** (39 mg). GPC:  $M_n$  13,000 g/mol,  $M_w/M_n = 2.59$ ;  $^1\text{H NMR}$  (400 MHz,  $\text{CDCl}_3$ ):  $\delta$  7.86 (bm), 7.40 (bm), 6.98 (bm), 6.77 (bm), 2.79–2.41 (bm), 2.06 (bm), 1.66–1.30 (bm), 0.86 (bm);  $^{19}\text{F NMR}$  (376 MHz,  $\text{CDCl}_3$ ):  $\delta$  -71.58 (bm), -90.06 (bm); IR ( $\text{cm}^{-1}$ ): 1611–1570 (triazole), 1493 (phenyl), 1458 (thiophene).

## Control Experiments with *n*-Butyl Bromide

In the deuterated methanol quenching experiment (4), there were 24% proton (H) back at the 4-position of P3HT. Although this proton might come from E2-elimination of *n*-butyl bromide by lithiated P3HT, our control experiments described in the following scheme showed that E2-elimination did not occur.

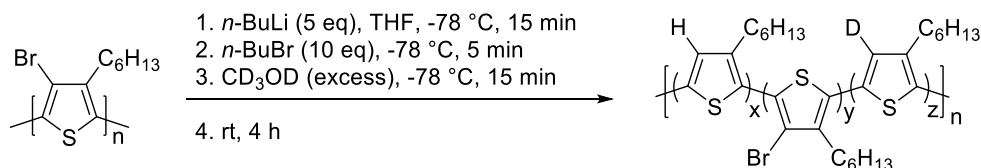

The key experimental design is to add 10 equivalent of *n*-BuBr after Li-Br has occurred and before quenching with deuterated methanol. If E2-elimination would occur, there could be more protons back at the 4-position than 24% which is without *n*-BuBr addition. The *n*-BuBr used here was purified by stirring it for 4 hours under K<sub>2</sub>CO<sub>3</sub>, followed by distillation in order to remove any proton impurities. Two independent reactions with the identical reaction condition were carried out in order to best assess whether E2-elimination would occur or not. Two NMR spectra are shown in the below.

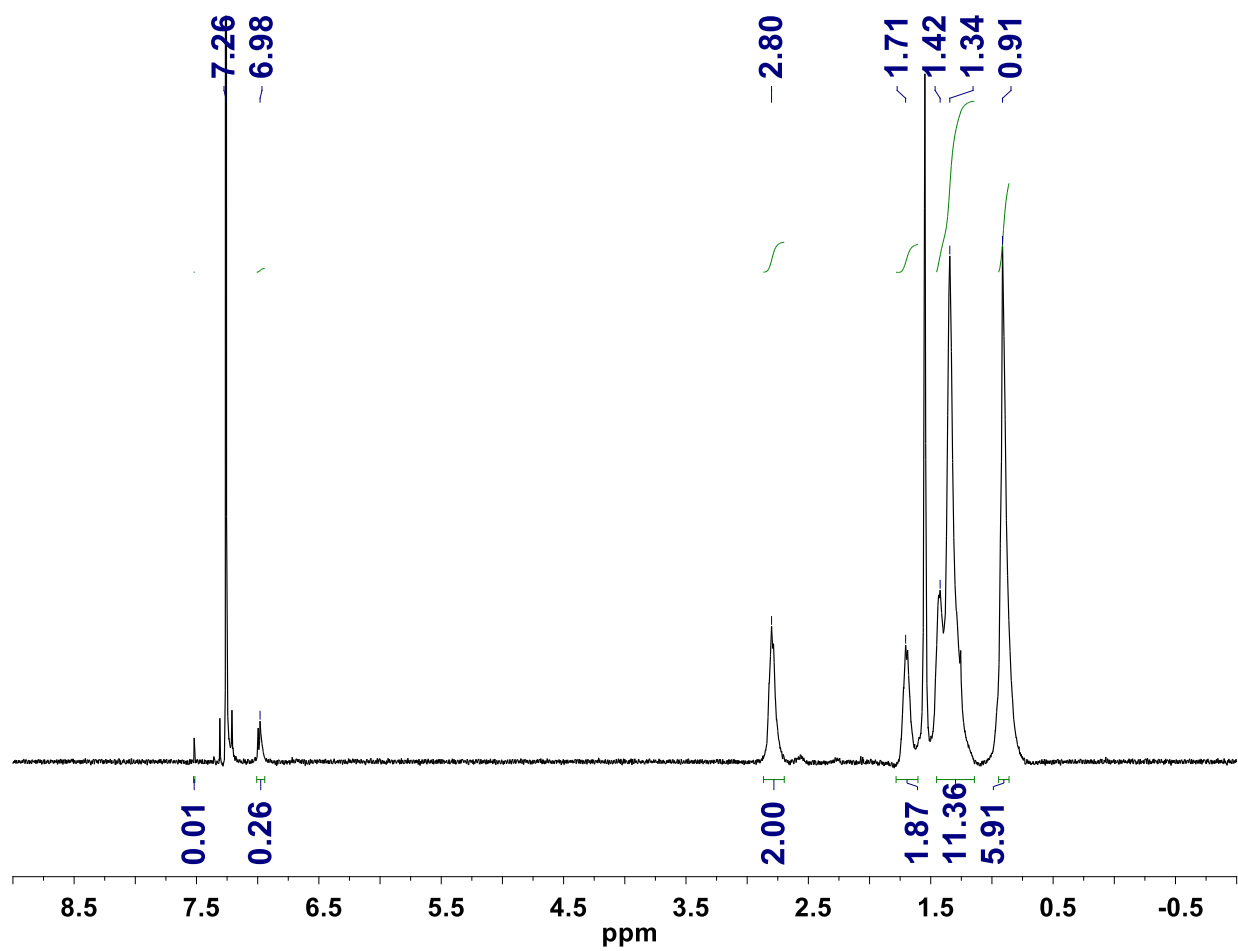

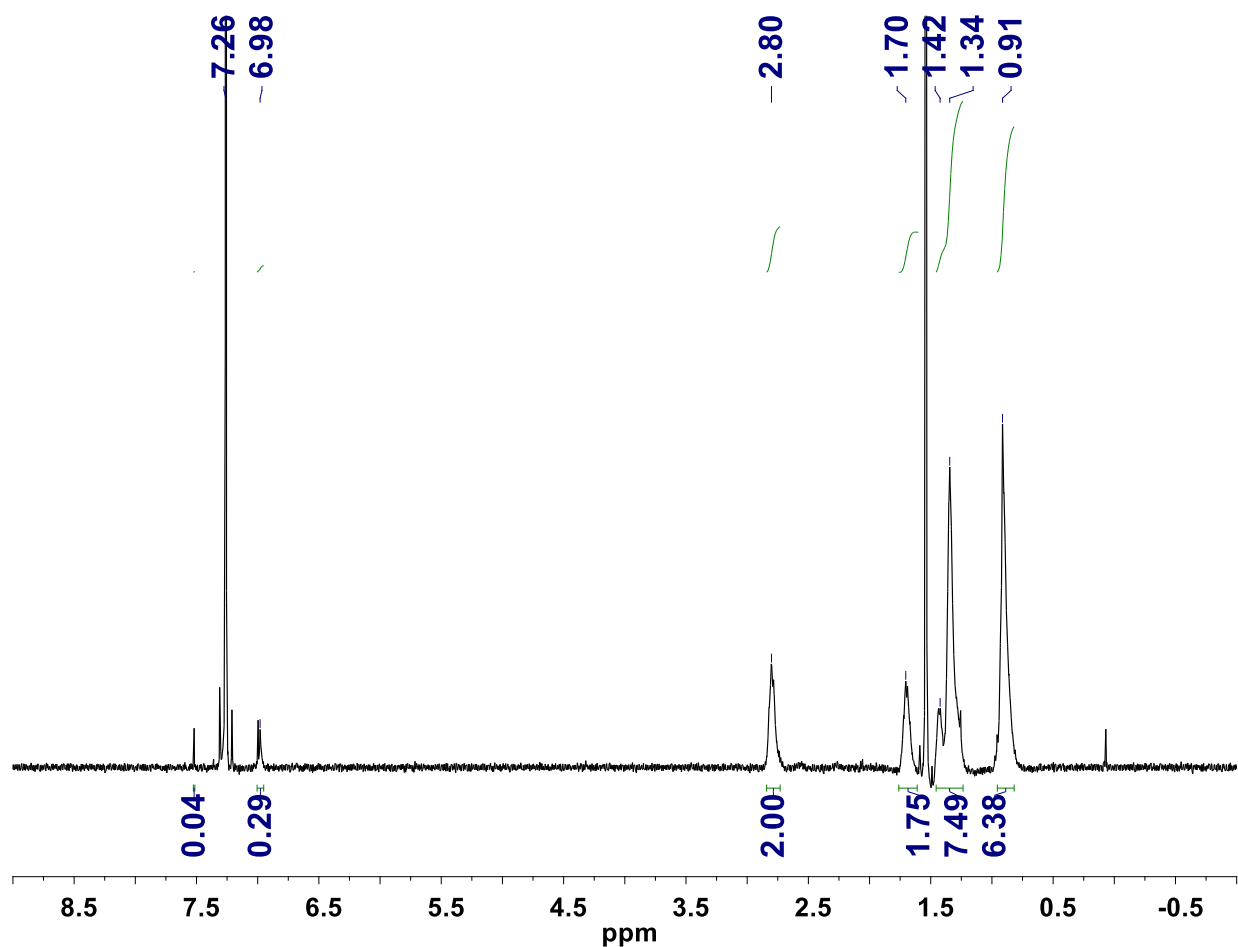

The recovered 4-position protons appeared at 6.98 ppm, and after subtracting <sup>13</sup>C-<sup>1</sup>H coupling satellite overlapped with the 4-position proton peak, we have seen that 25% protons are back in both independent experiments. This 25% is almost identical to the reaction in the paper (24%) without the addition of *n*-butyl bromide; that is, E2-elimination did not occur, and the recovered proton could be attributed to other proton sources as described in the paper. We think that at a low temperature (-78 °C) it would be hard to undergo E2 elimination, and subsequent electrophiles are much more reactive enough to quench all the polyolithiates.



## Cyclic Voltammetry Data

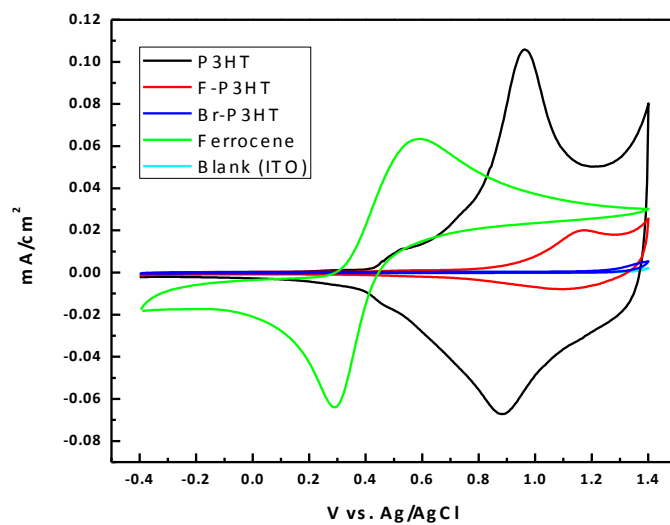

Cyclic voltammetry curves of P3HT (black), F-P3HT (red), Br-P3HT (blue), ferrocene (light green), and blank measured on bare ITO (light blue).

## Gel Permeation Chromatography Traces

All the Gel Permeation Chromatography (GPC) traces are plotted here. First, Br-P3HT from batch #1 to batch #4 is shown below. All Br-P3HT traces exhibit similar shape. Number-averaged molecular weights of a few peaks are indicated.

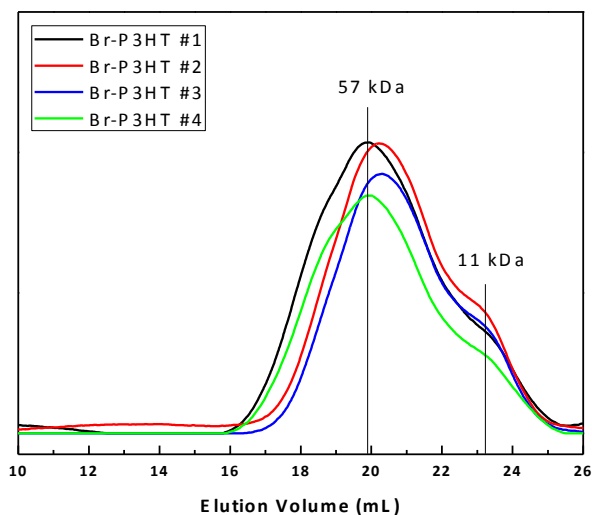

The GPC traces of compound **3a** – **3d** are plotted below. Their starting Br-P3HT #3 is also shown together. Number-averaged molecular weights of a few peaks are indicated.

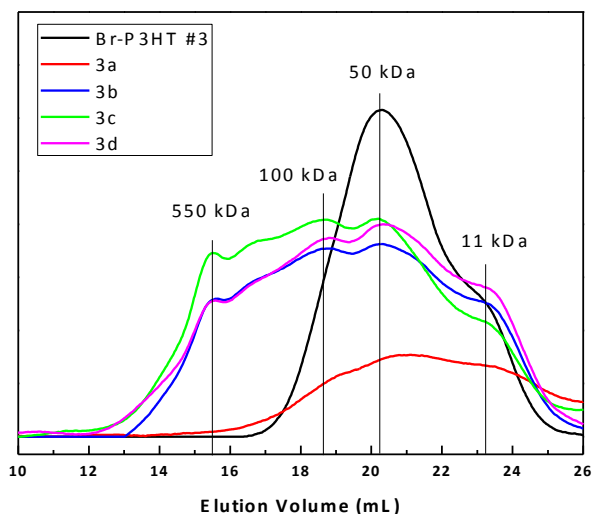

The GPC traces of ketone-functionalized P3HT (**5** – **11**) are shown below. The most frequently used Br-P3HT (#1 for ketone-functionalized P3HT) is plotted together for comparison. Number-averaged molecular weights of a few peaks are indicated.

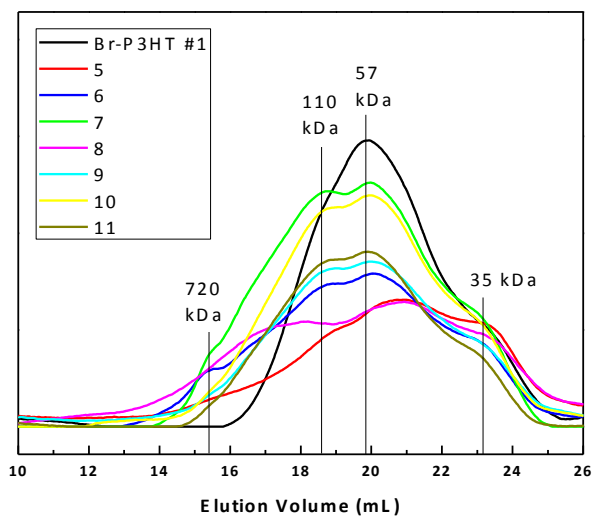

The GPC traces of secondary alcohol-functionalized P3HT (**12** – **14**) are shown below. The most frequently used Br-P3HT (#2 for secondary alcohol-functionalized P3HT) is plotted together for comparison. Number-averaged molecular weights of a few peaks are indicated.

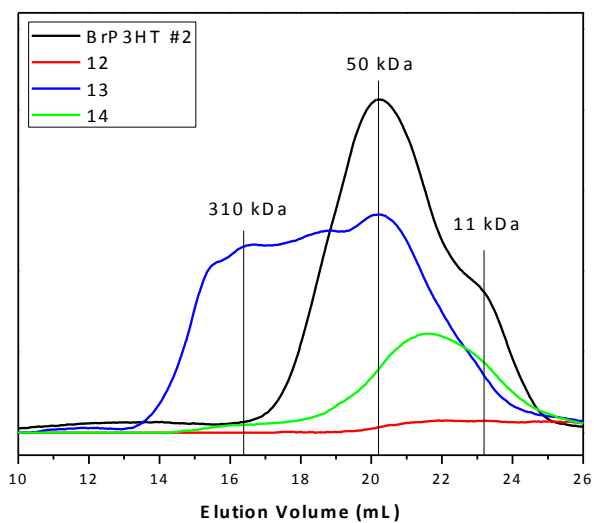

The GPC traces of 15, 16, and 19 are plotted below with their corresponding starting polymer Br-P3HT.

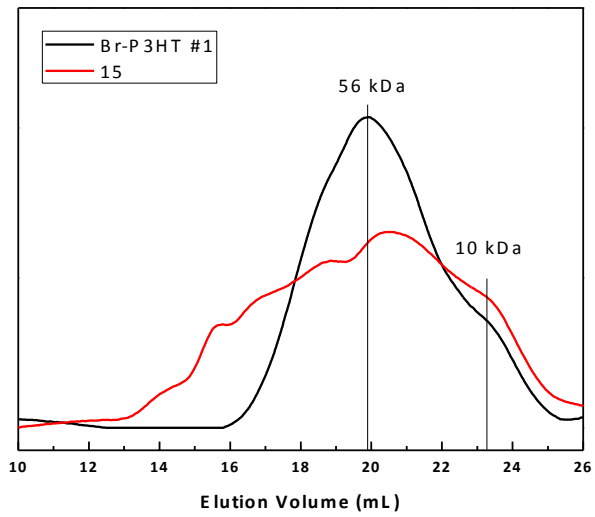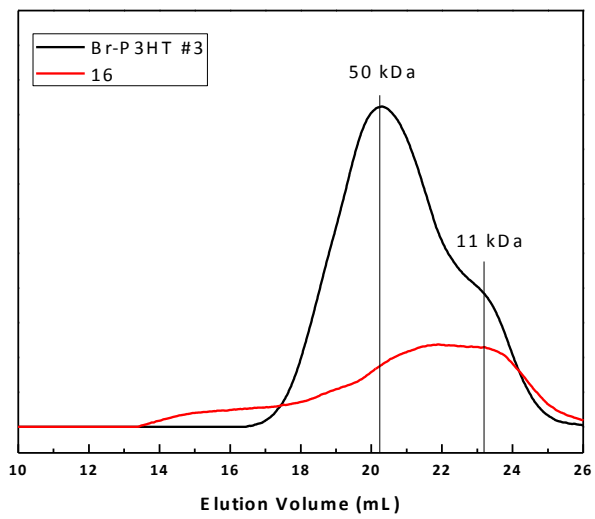

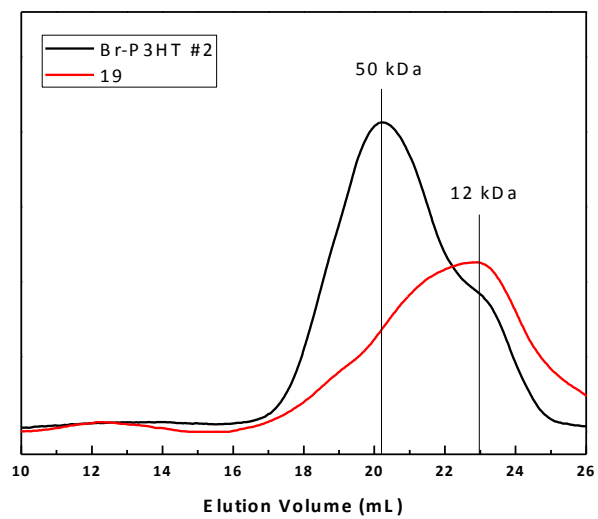

# $^1\text{H}$ and $^{19}\text{F}$ NMR Spectra

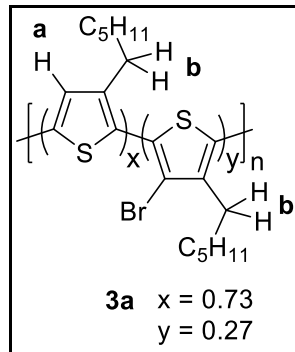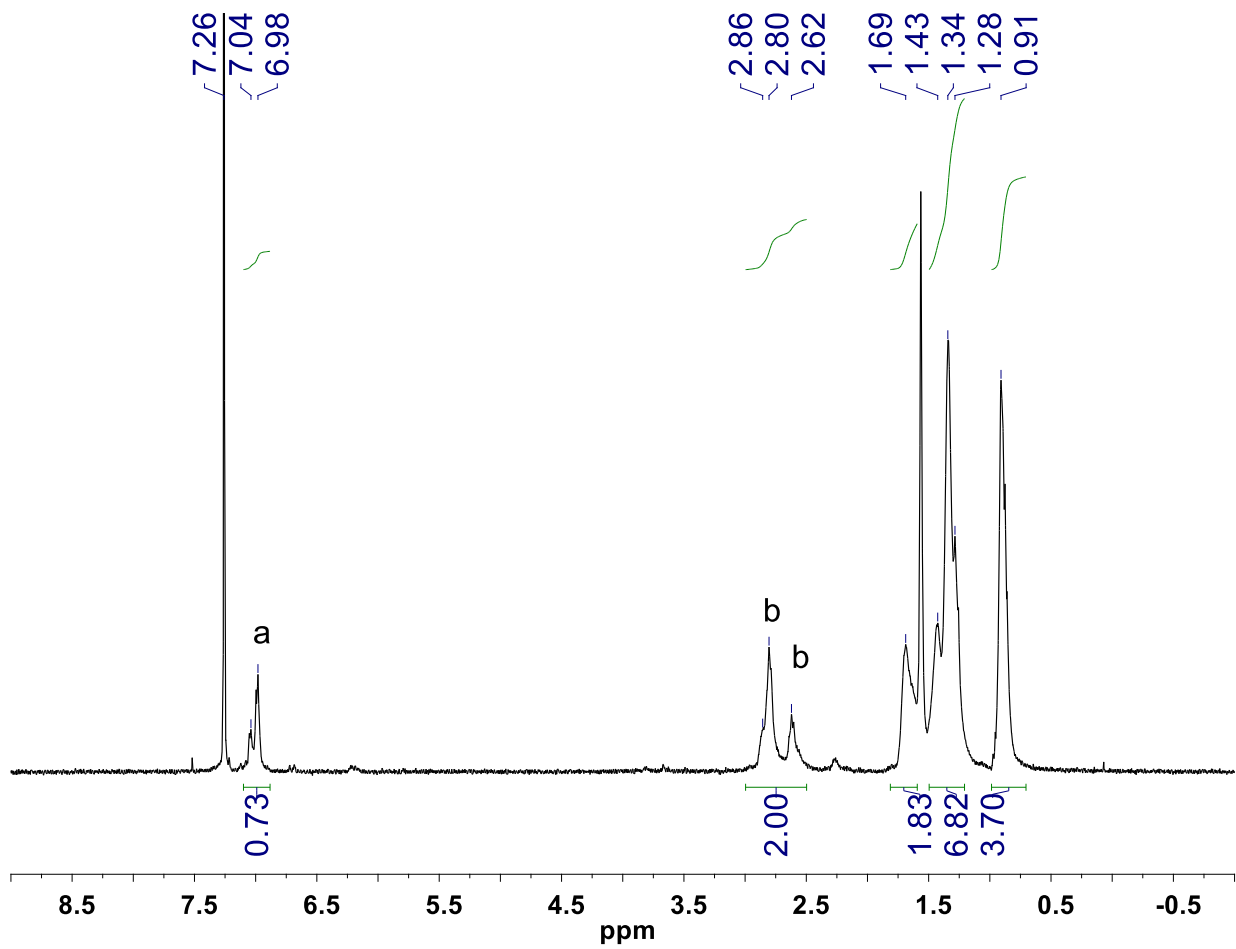

Figure S1. Compound 3a.

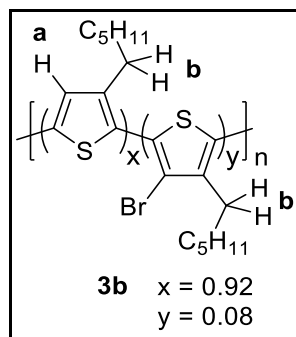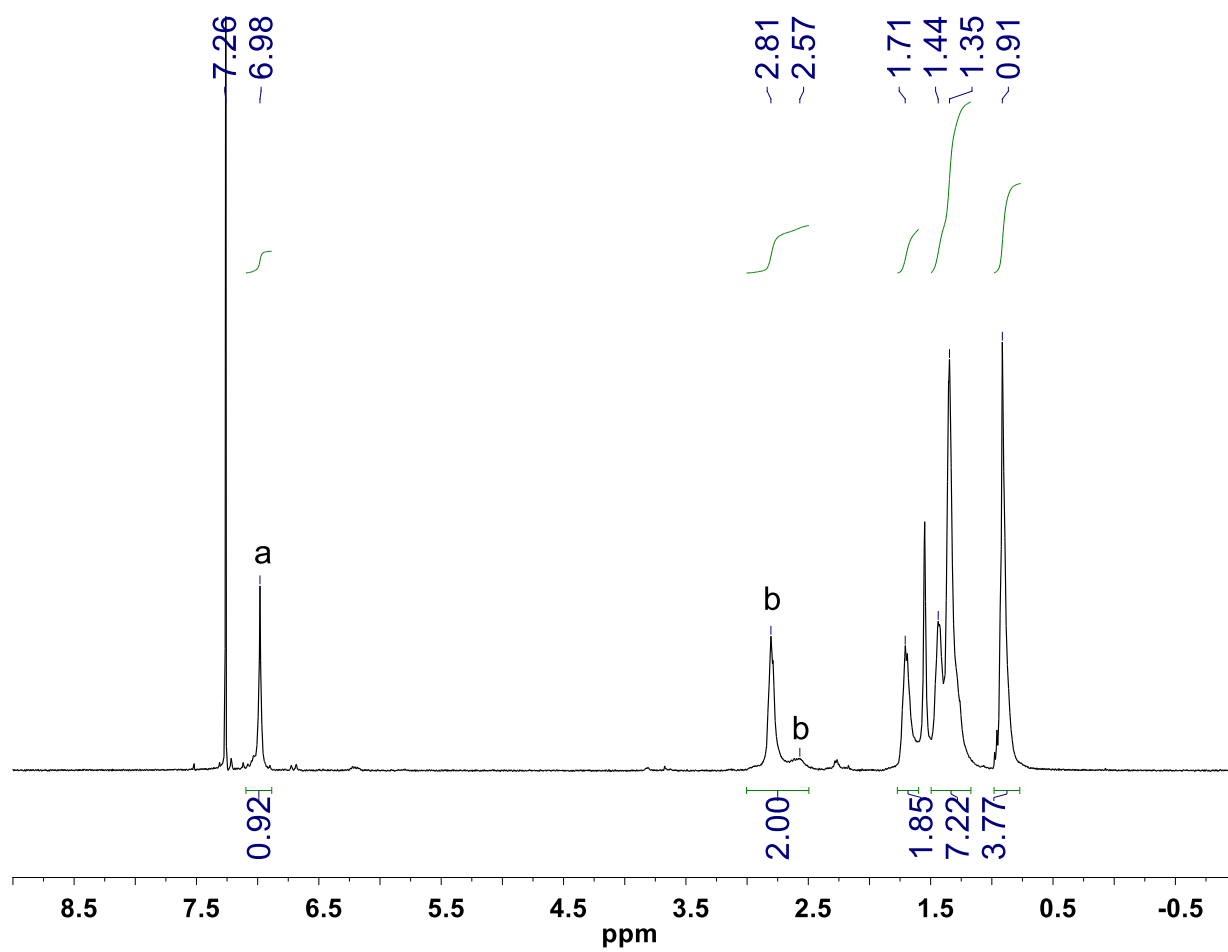

Figure S2. Compound **3b**.

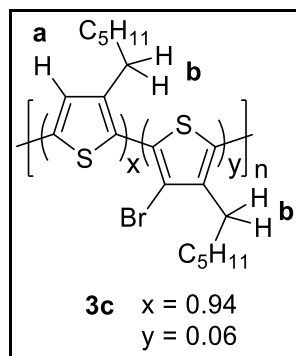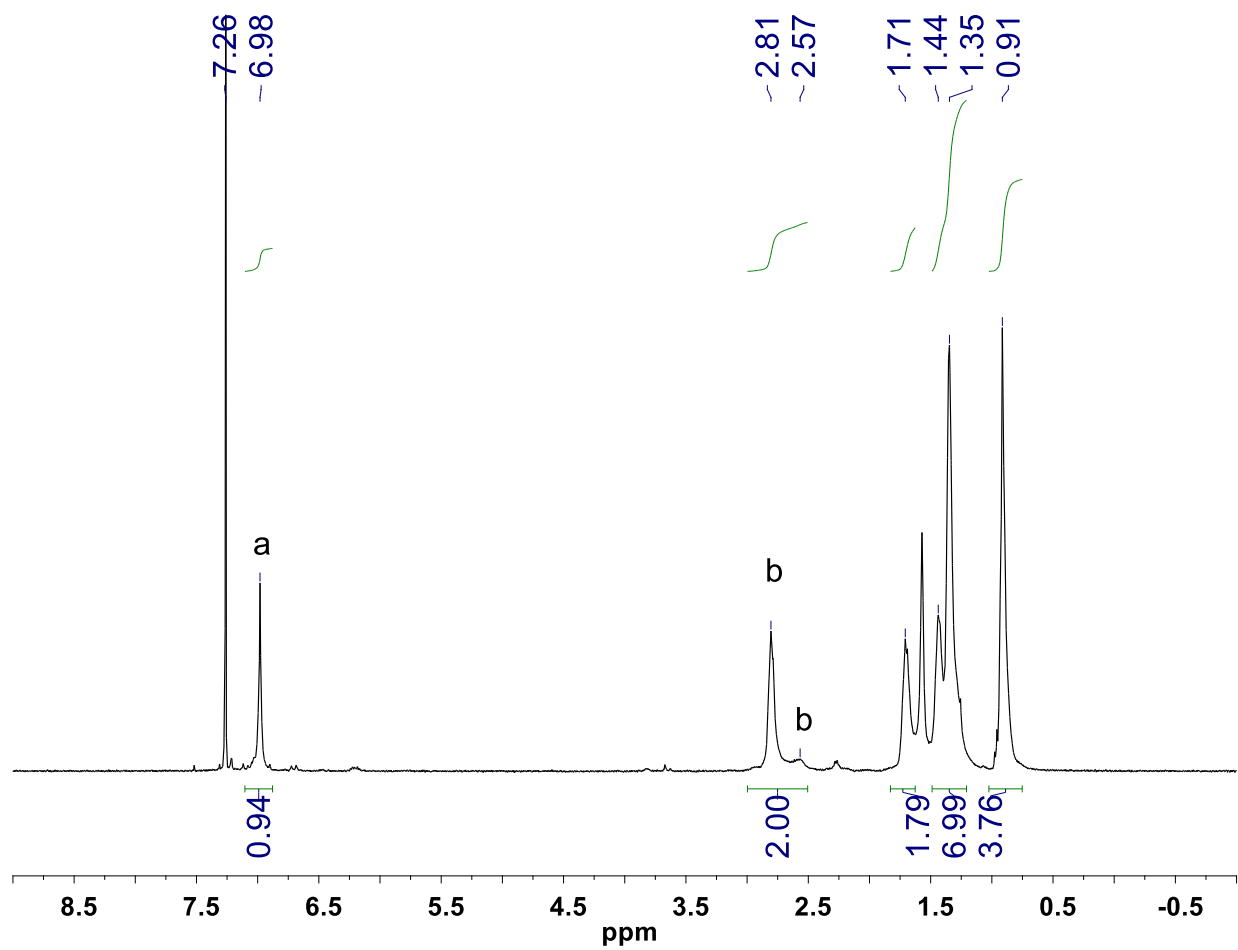

Figure S3. Compound 3c.



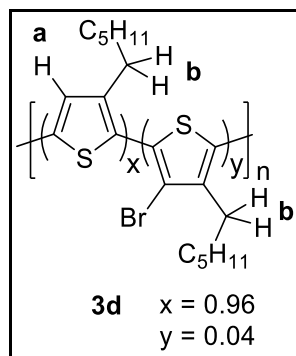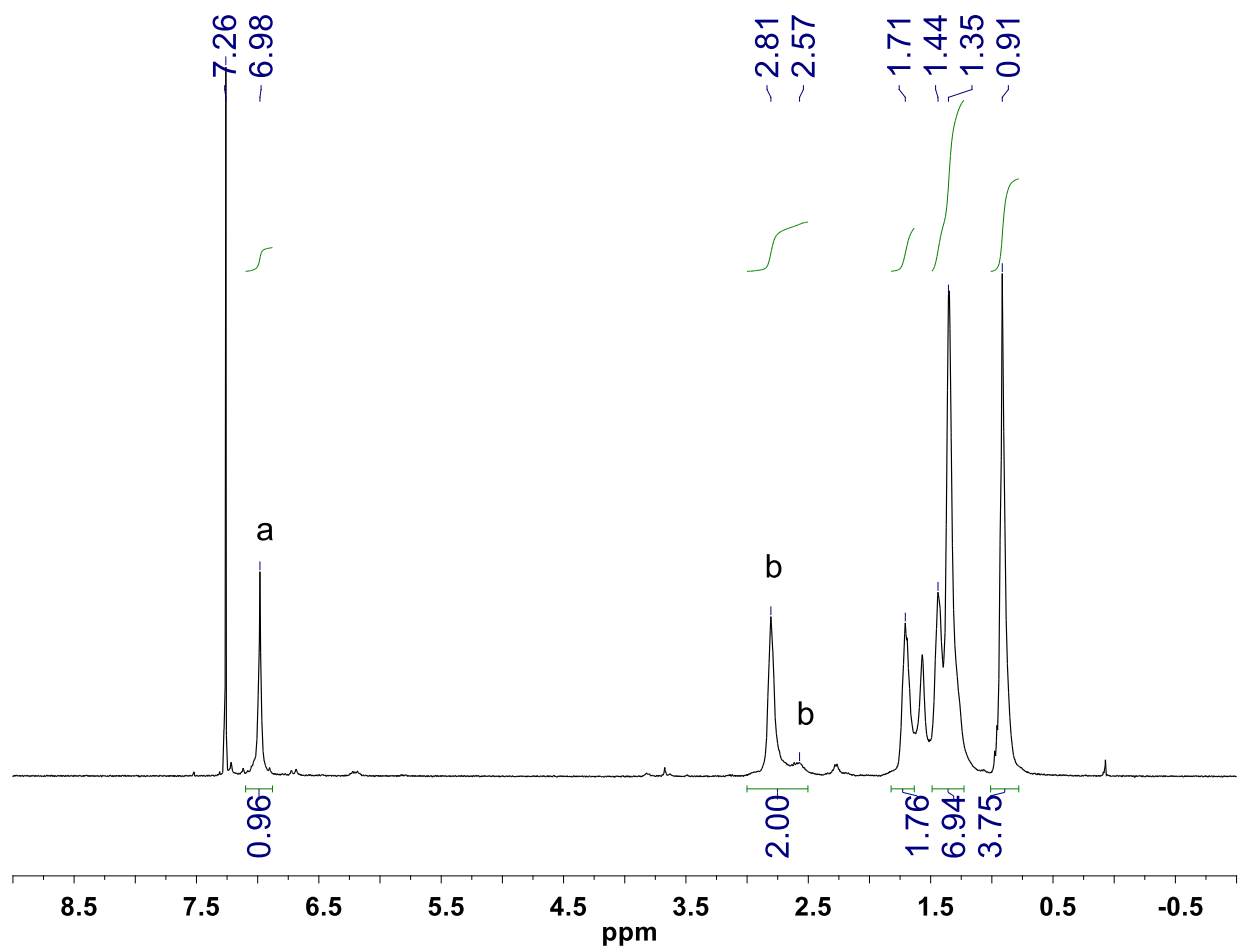

Figure S4. Compound 3d.

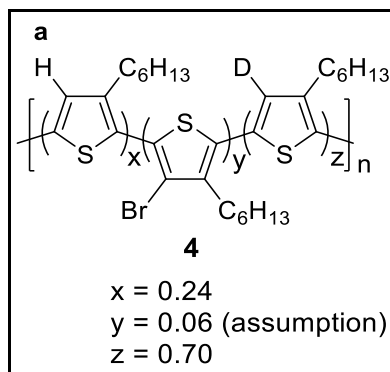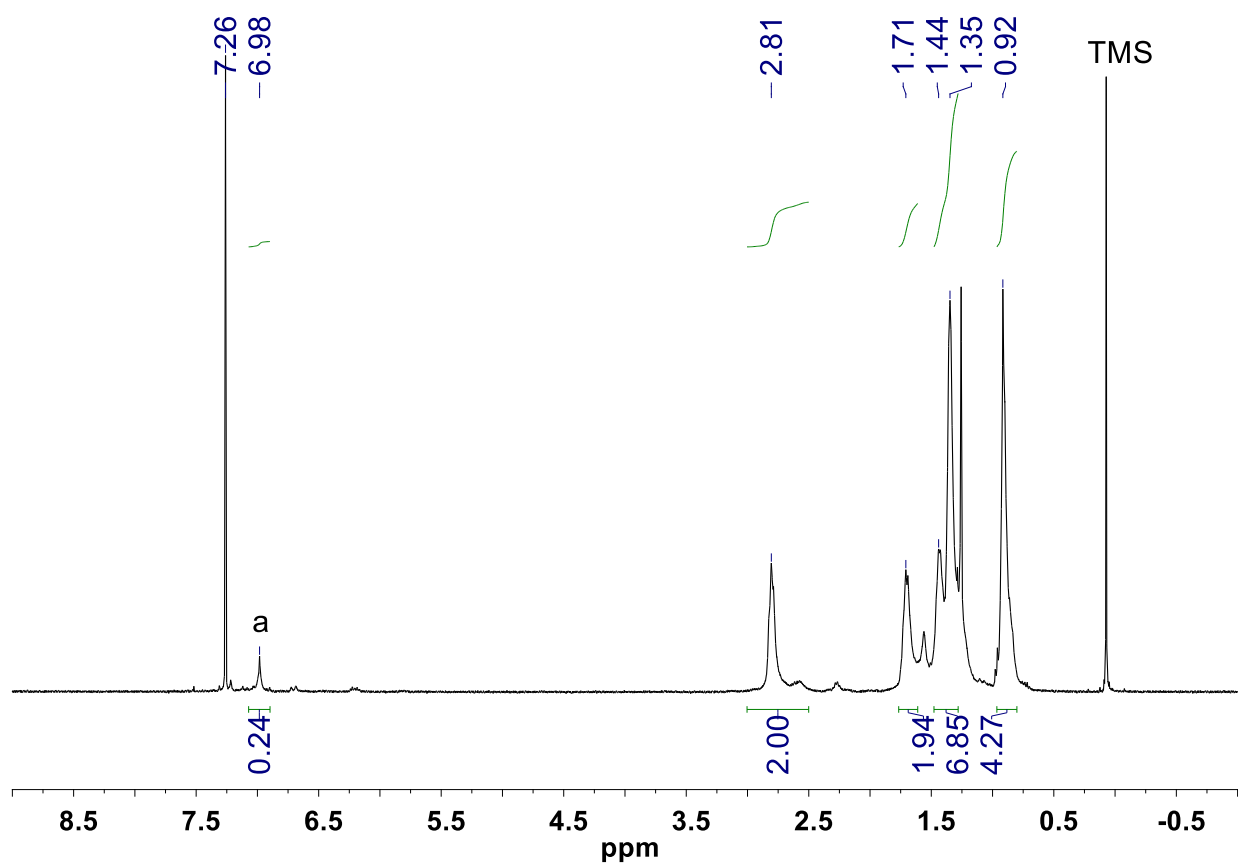

Figure S5. Compound 4.

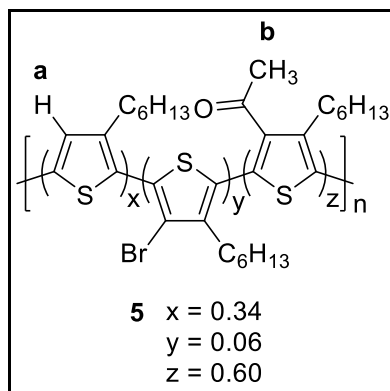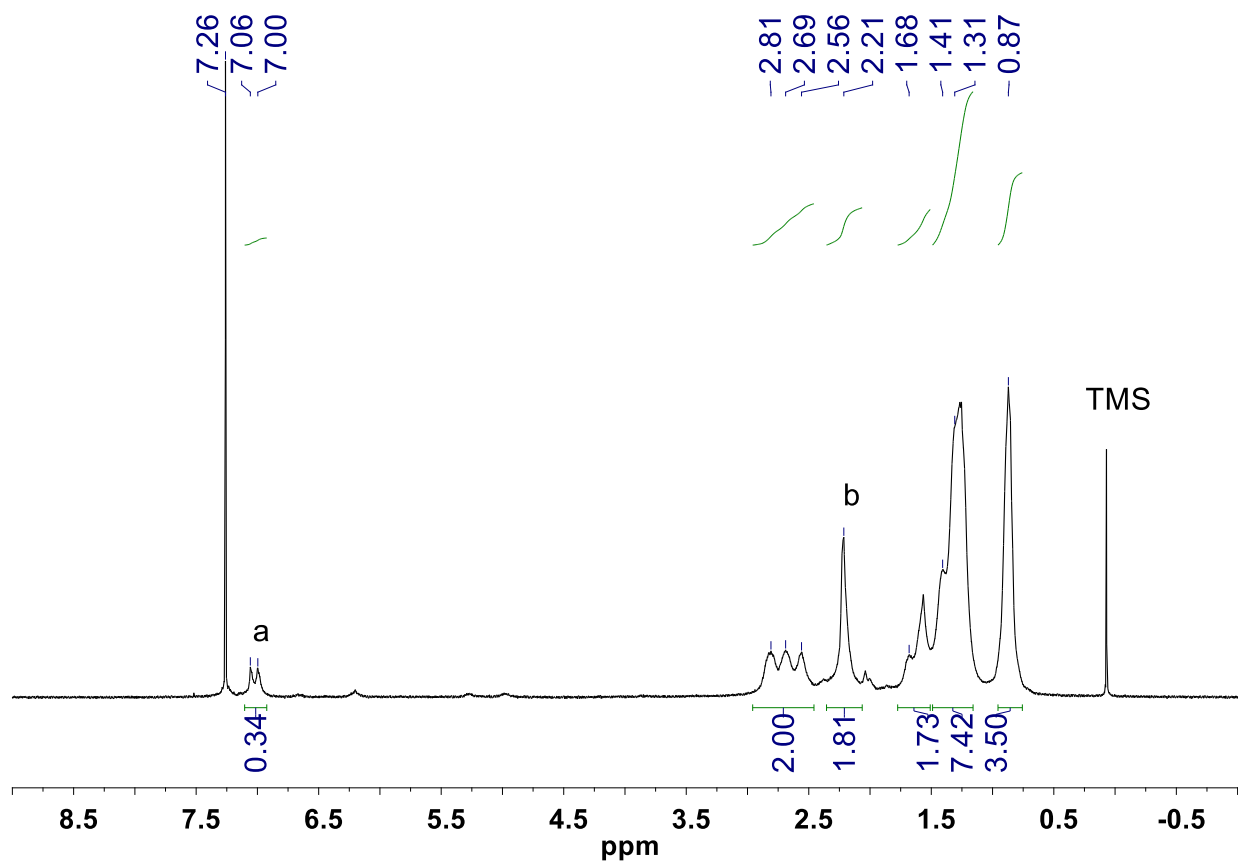

Figure S6. Compound 5.

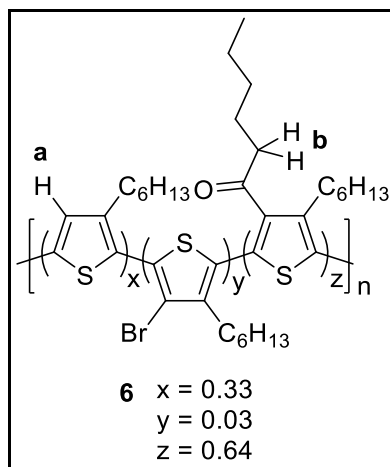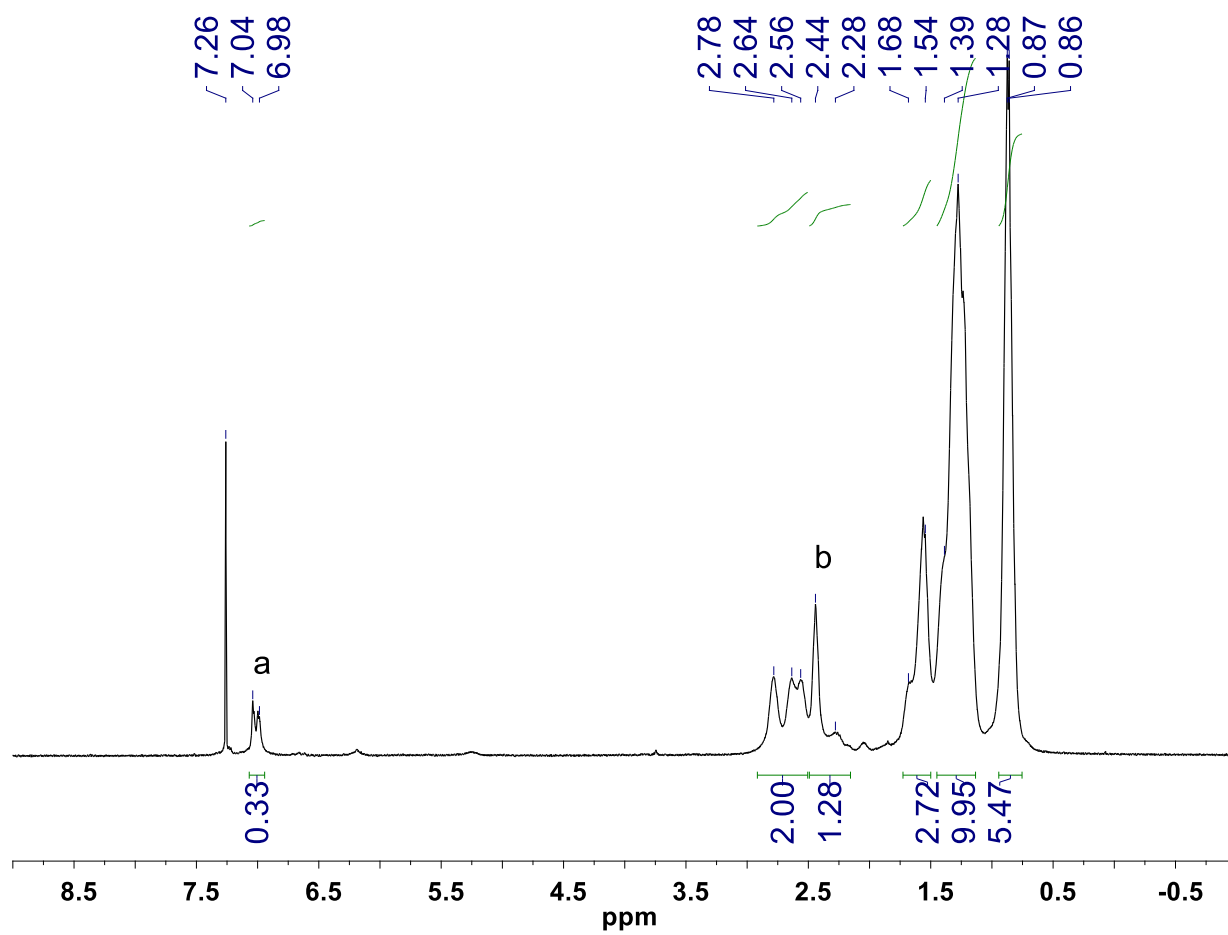

Figure S7. Compound 6.

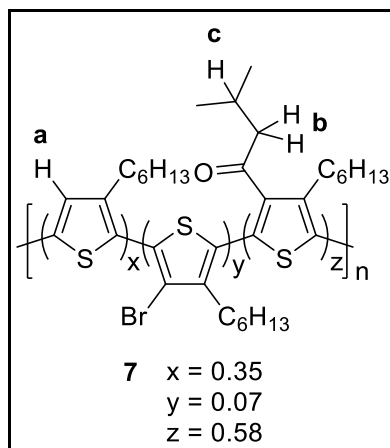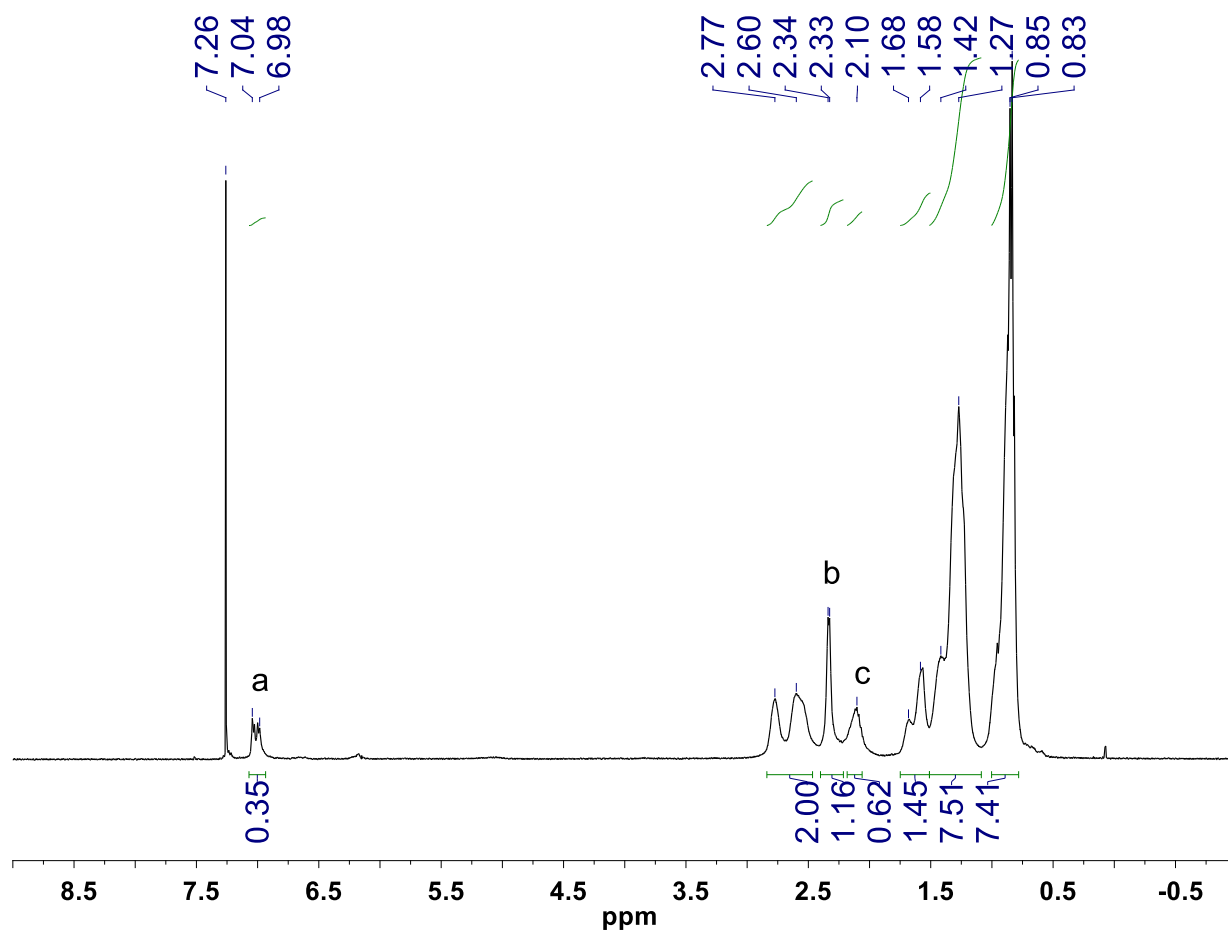

Figure S8. Compound 7.

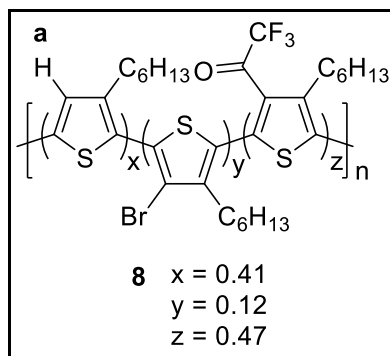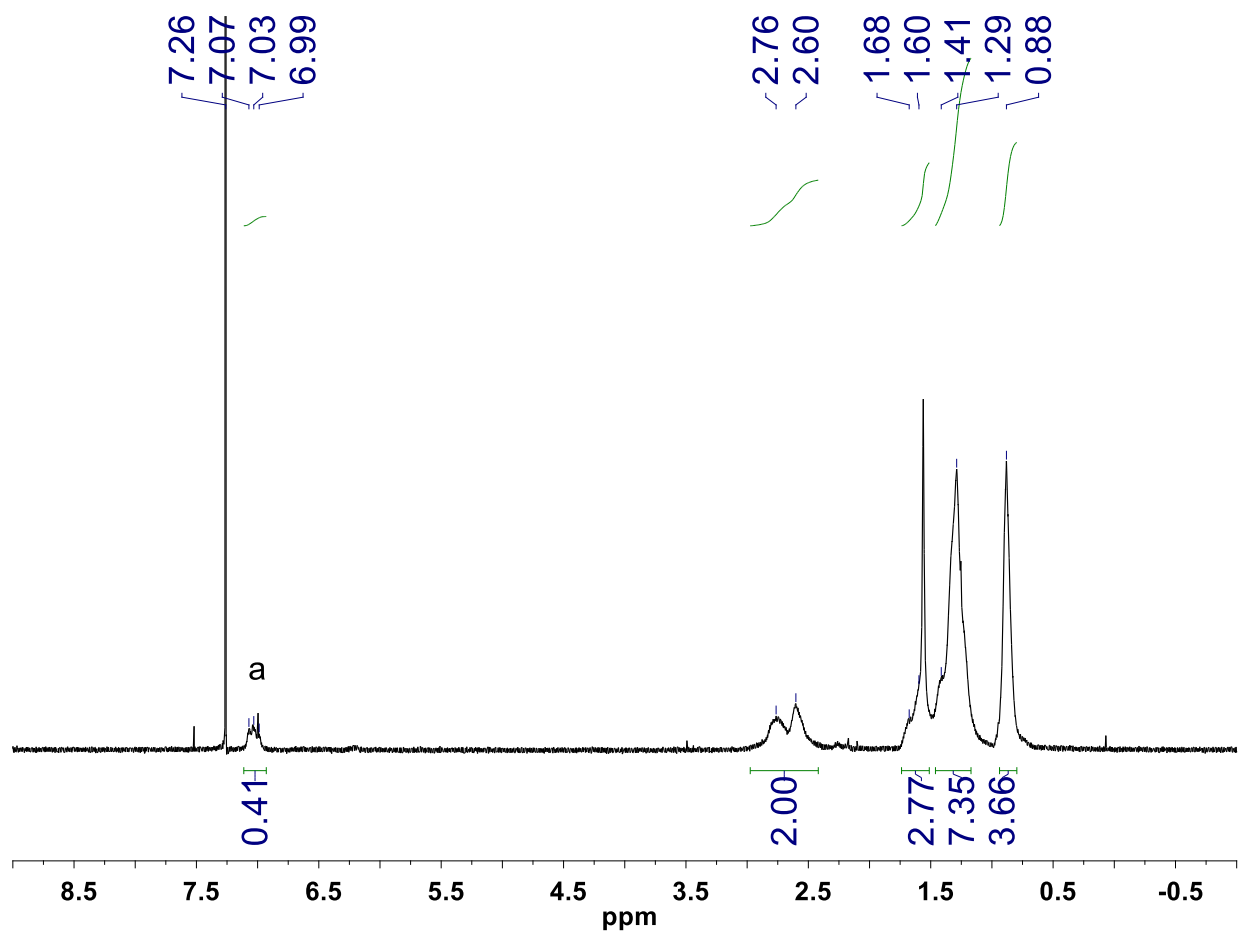

Figure S9. Compound 8.

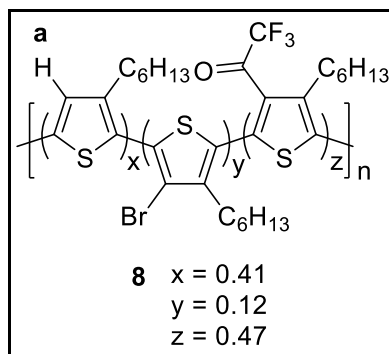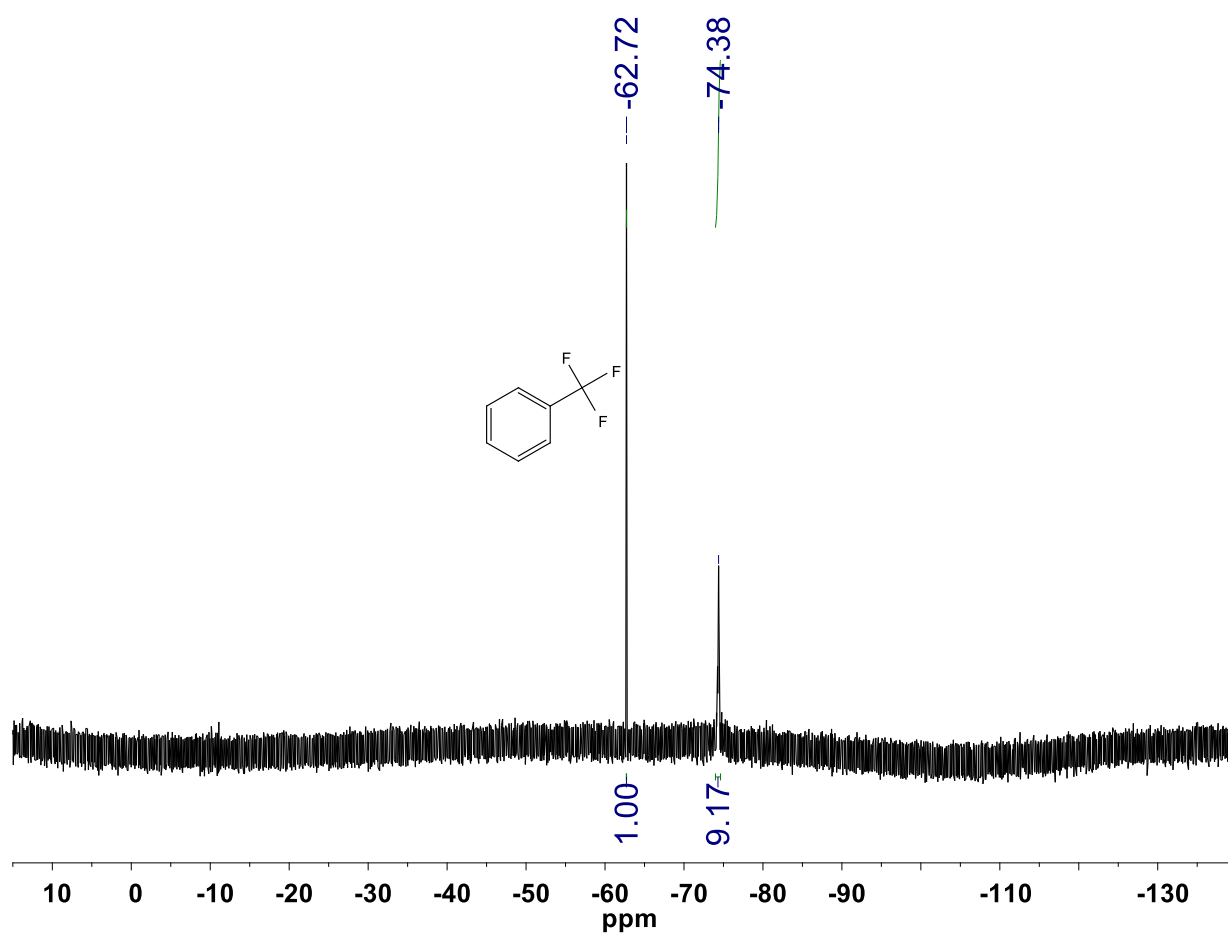

**Figure S10.** Compound **8** ( $^{19}\text{F}$  NMR).

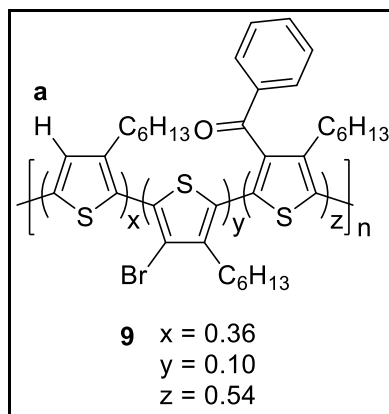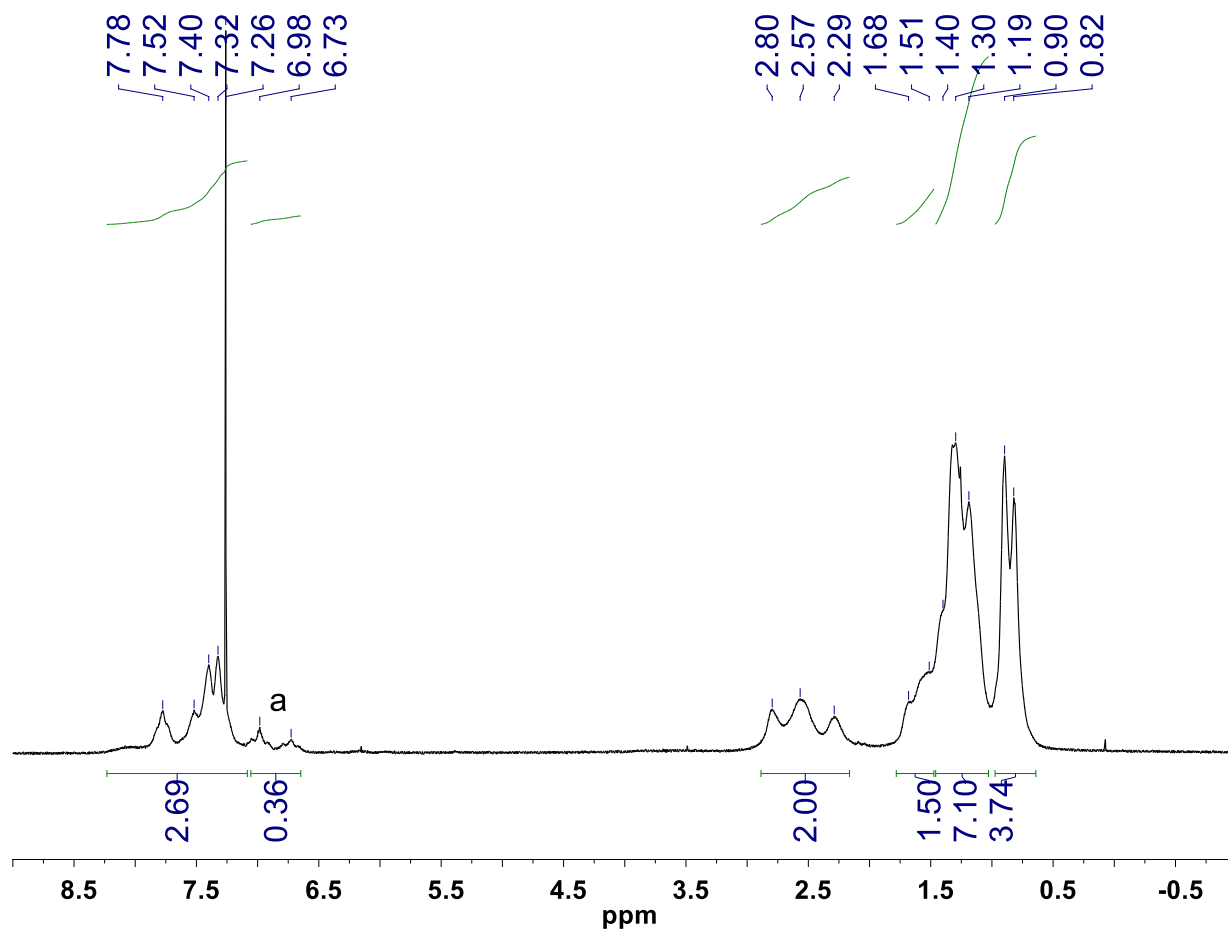

Figure S11. Compound 9.



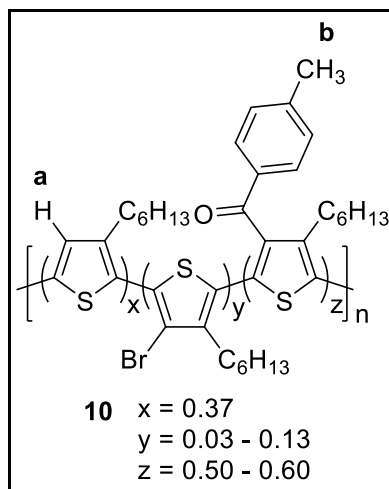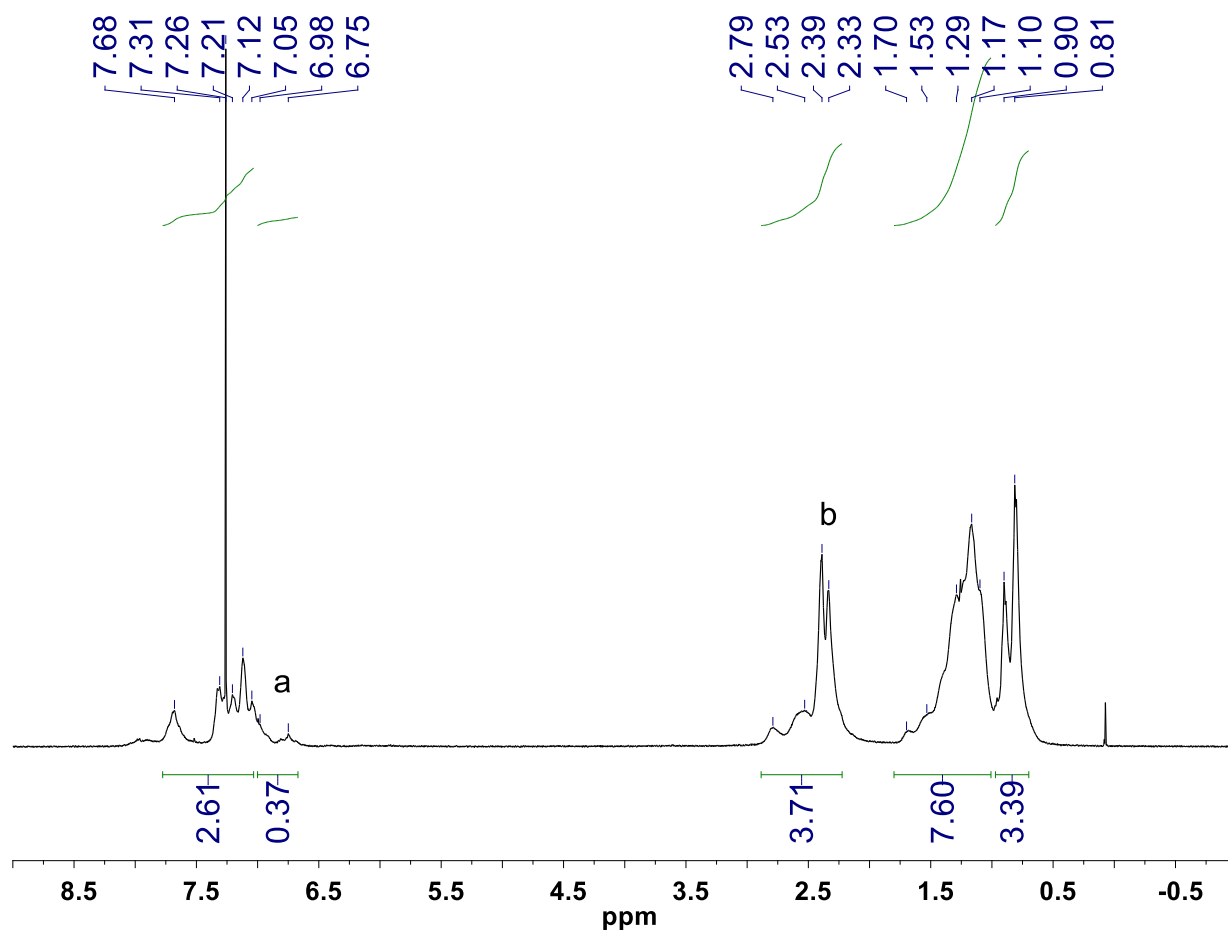

Figure S12. Compound **10** (Integration value based on 57 % conversion).

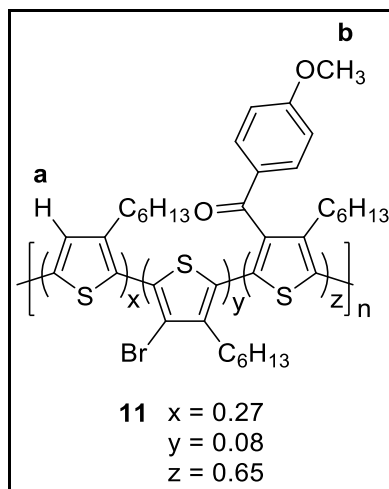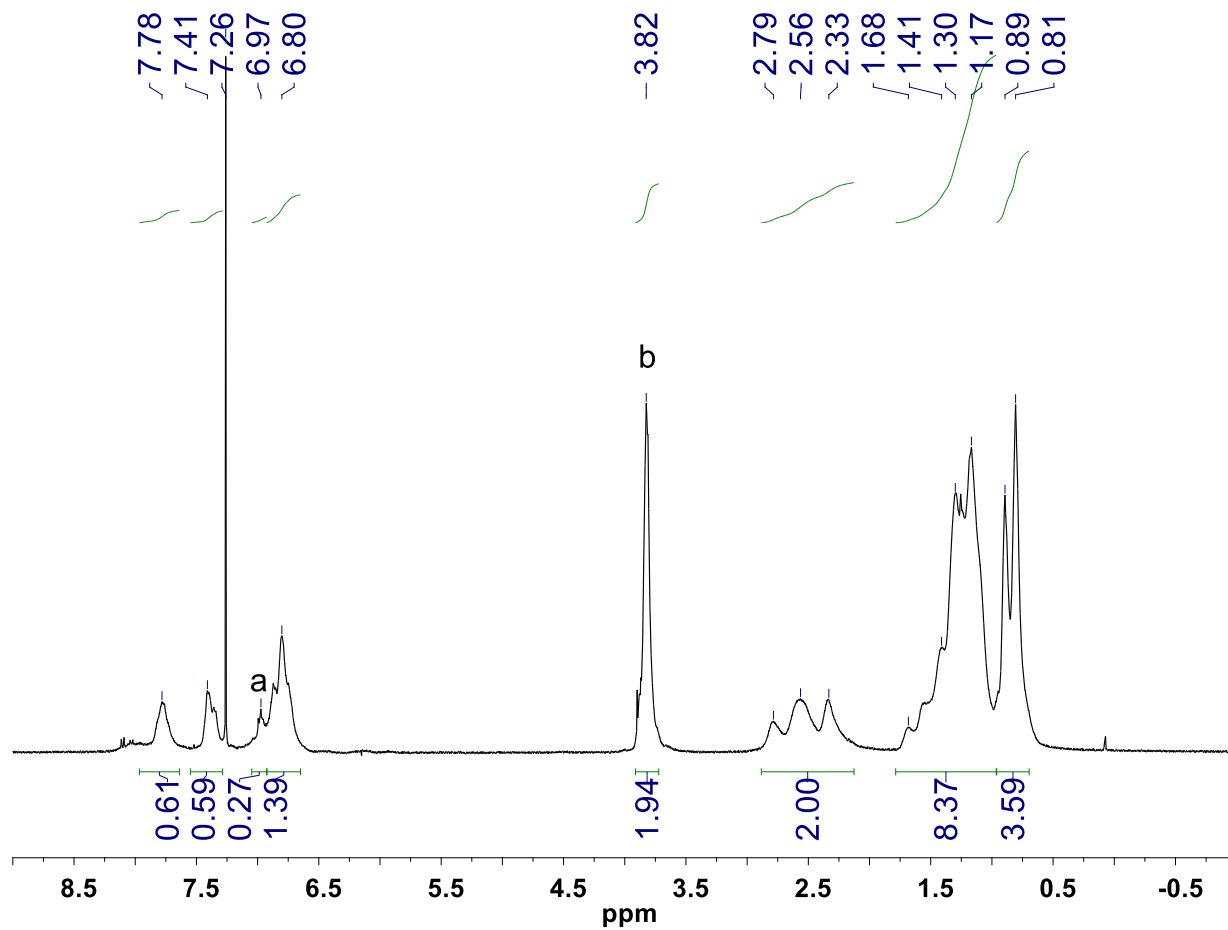

Figure S13. Compound 11.

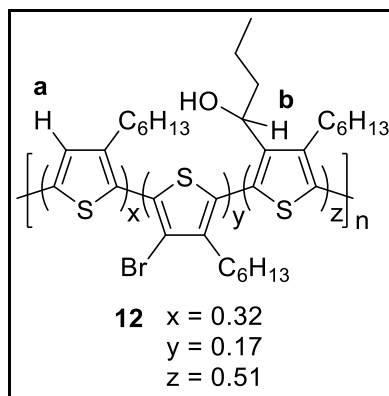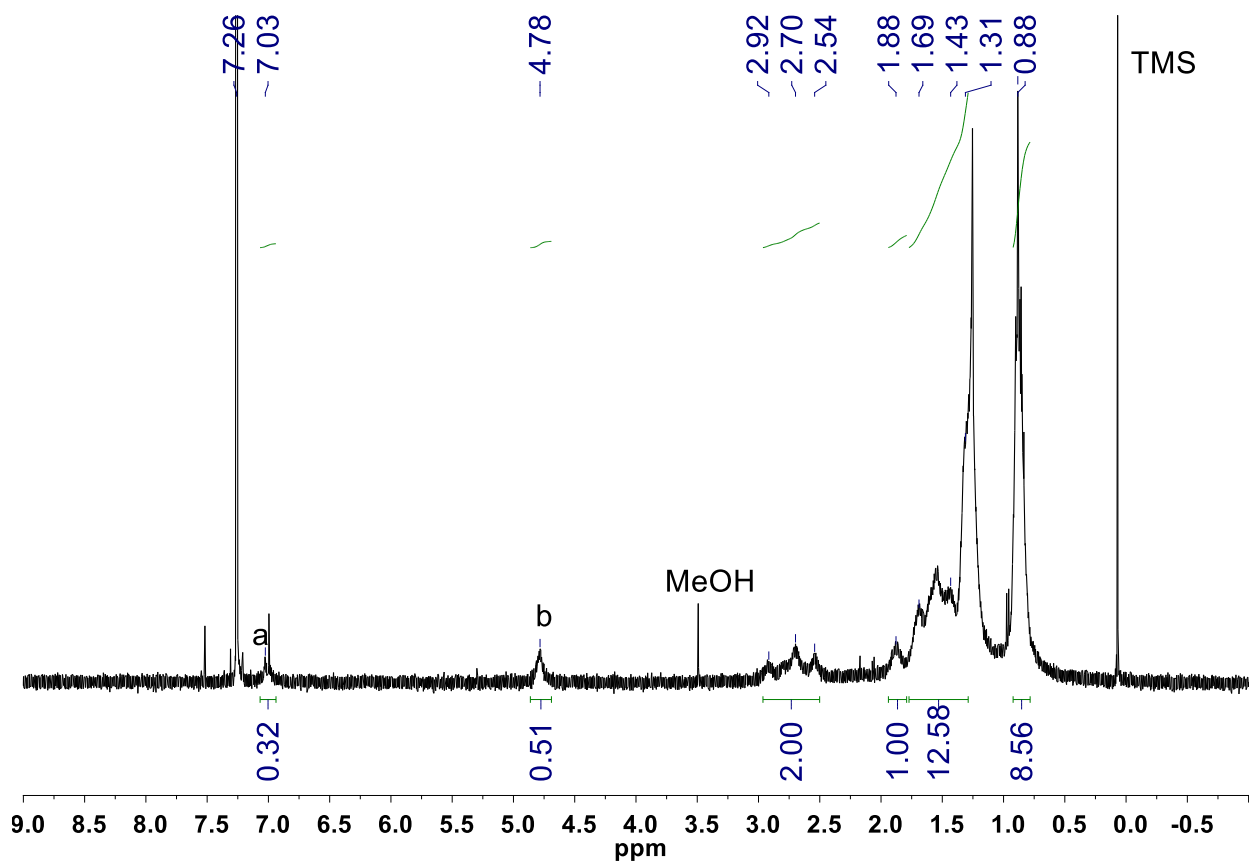

Figure S14. Compound 12.

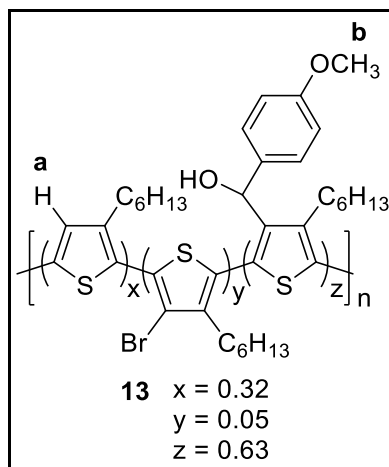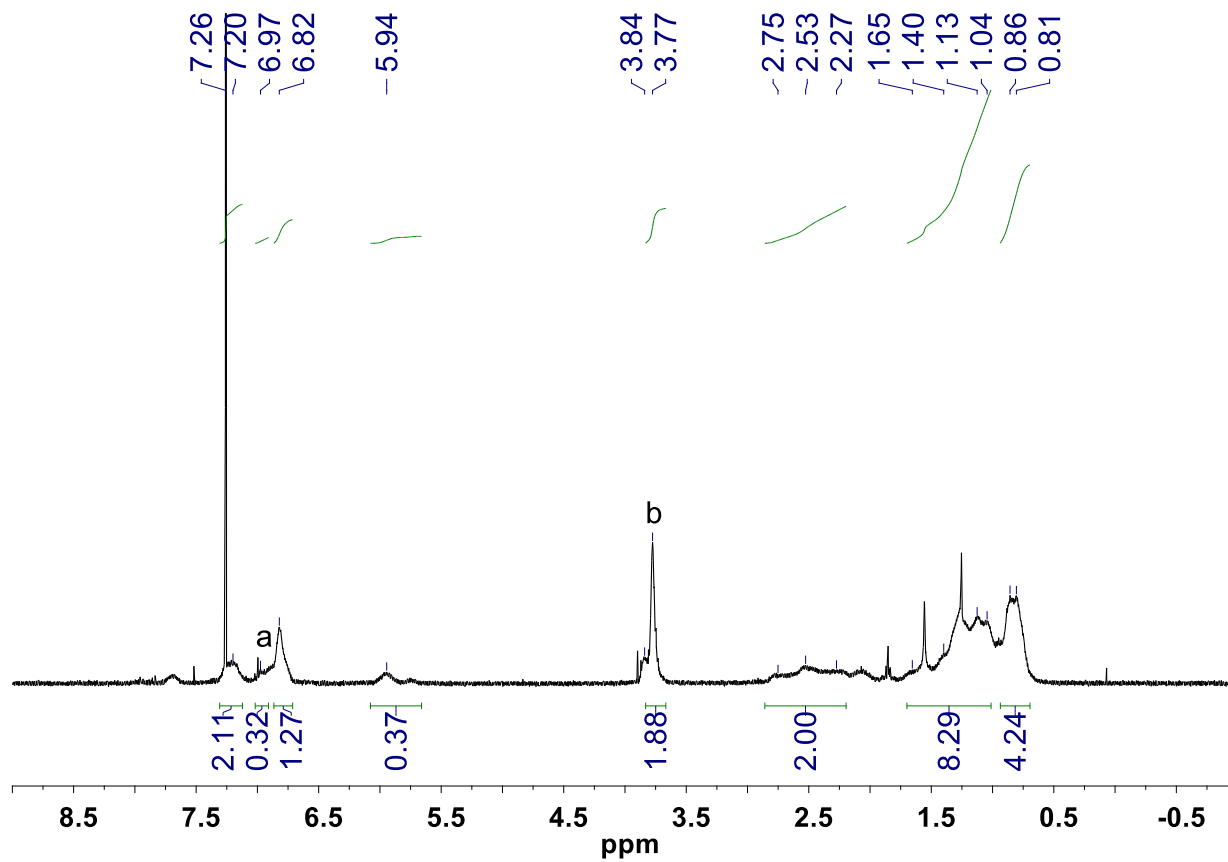

Figure S15. Compound 13.

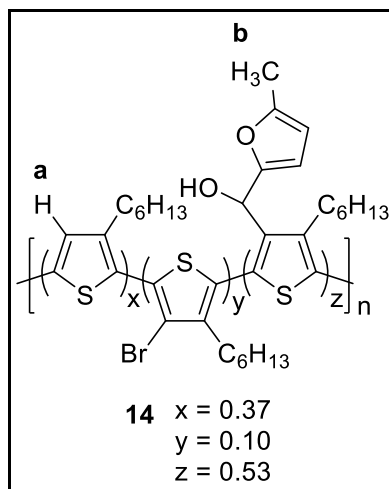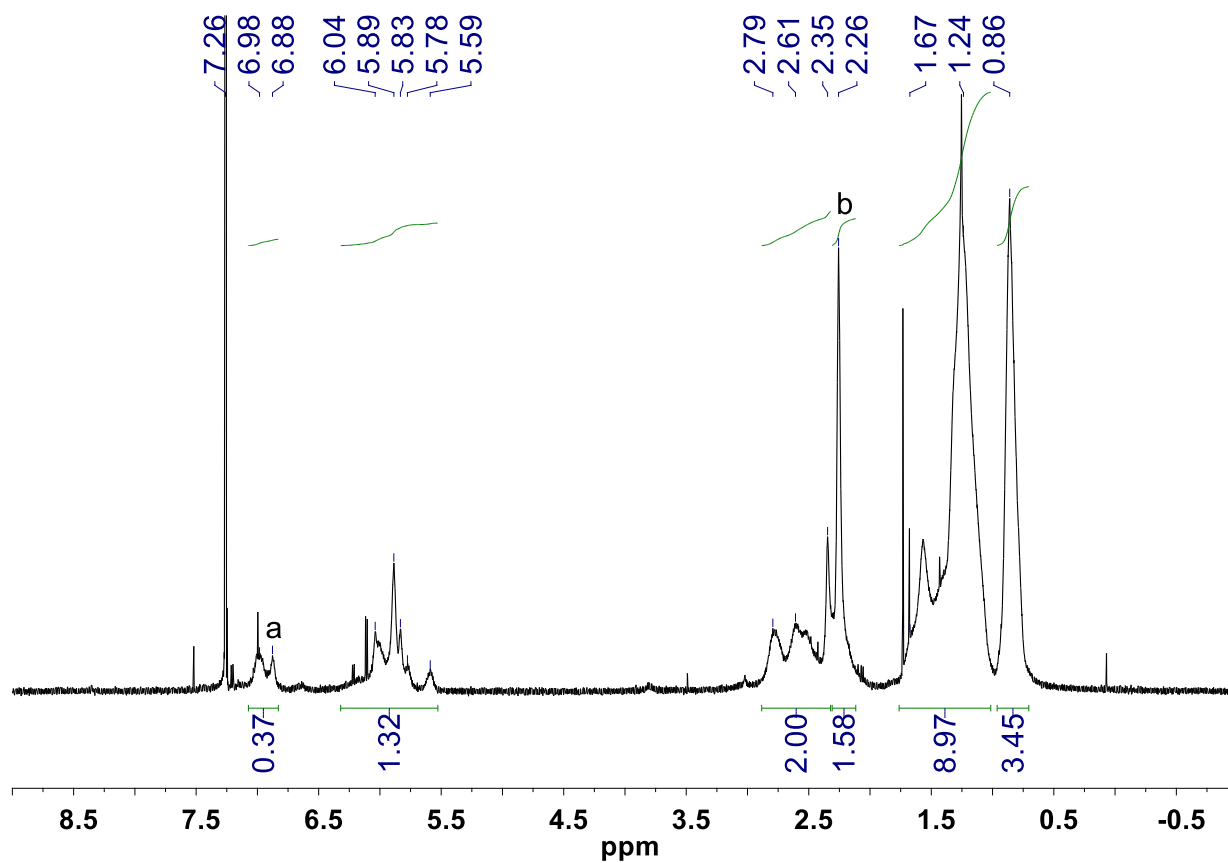

Figure S16. Compound 14.

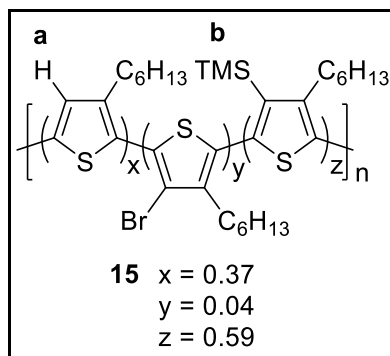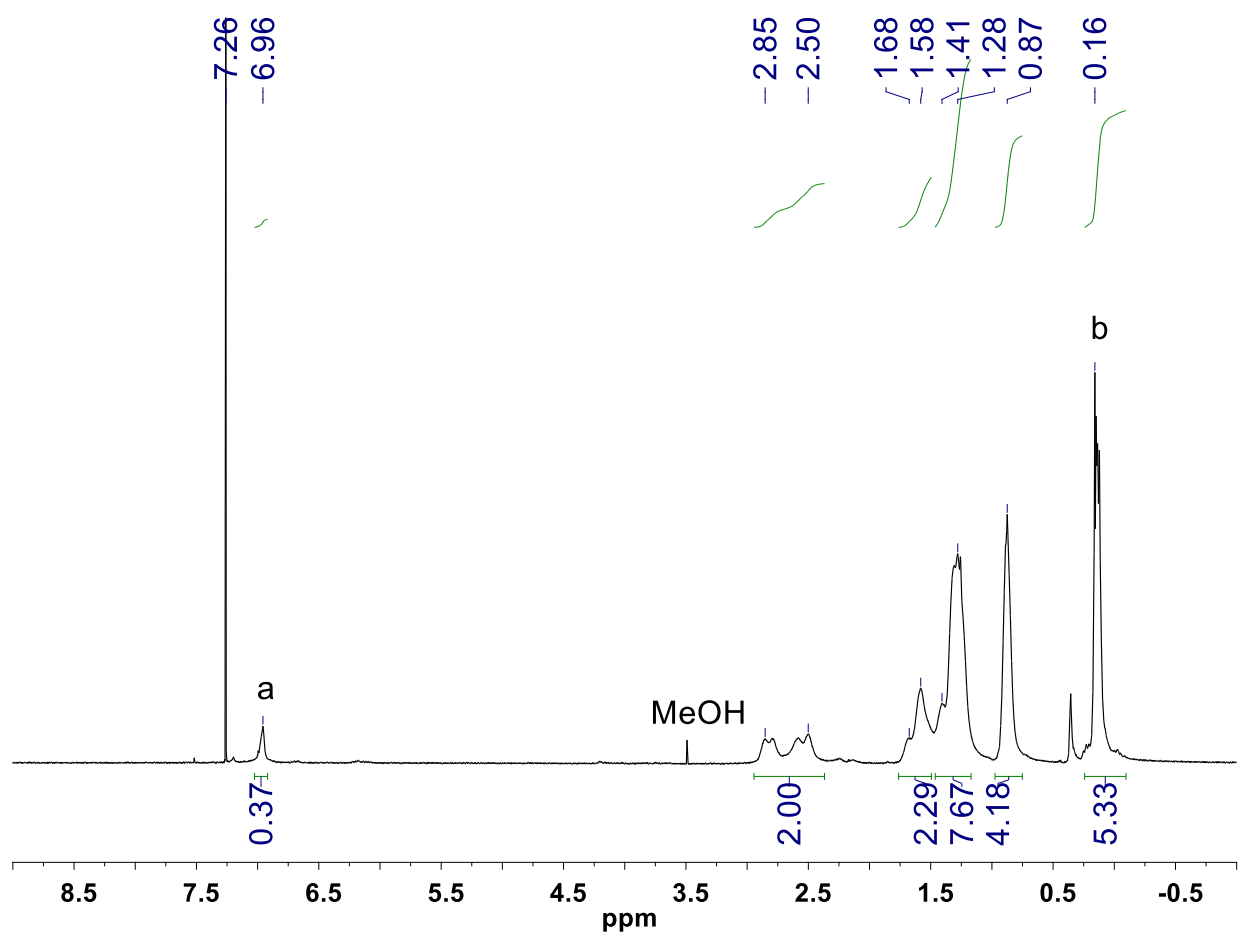

Figure S17. Compound 15.

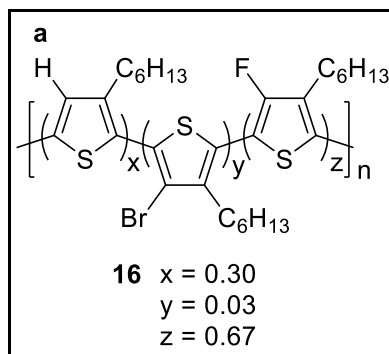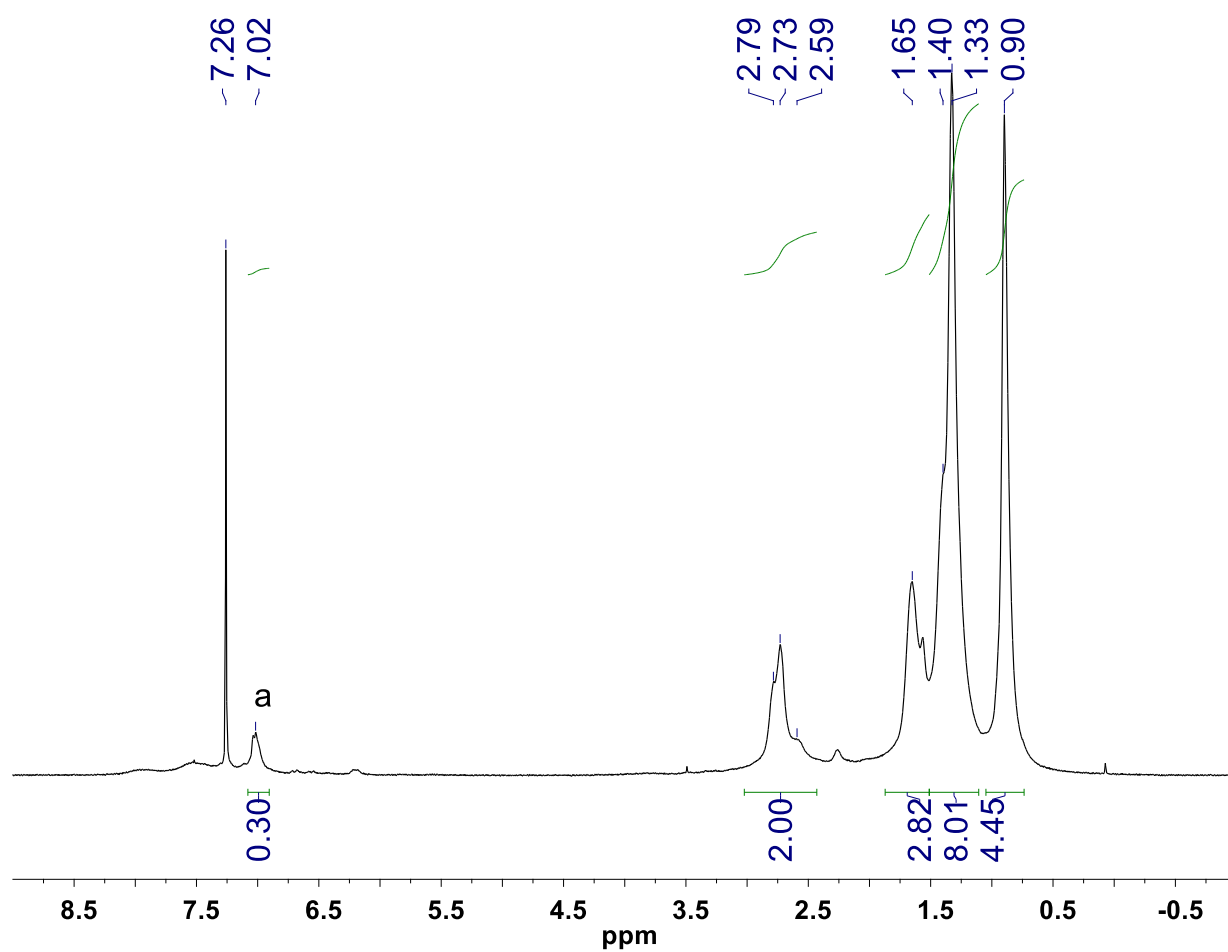

Figure S18. Compound 16.

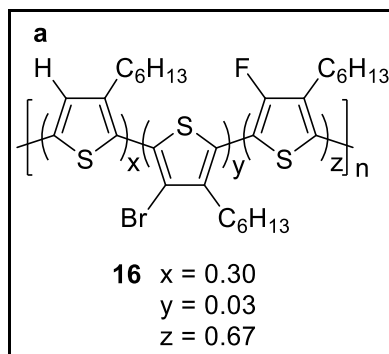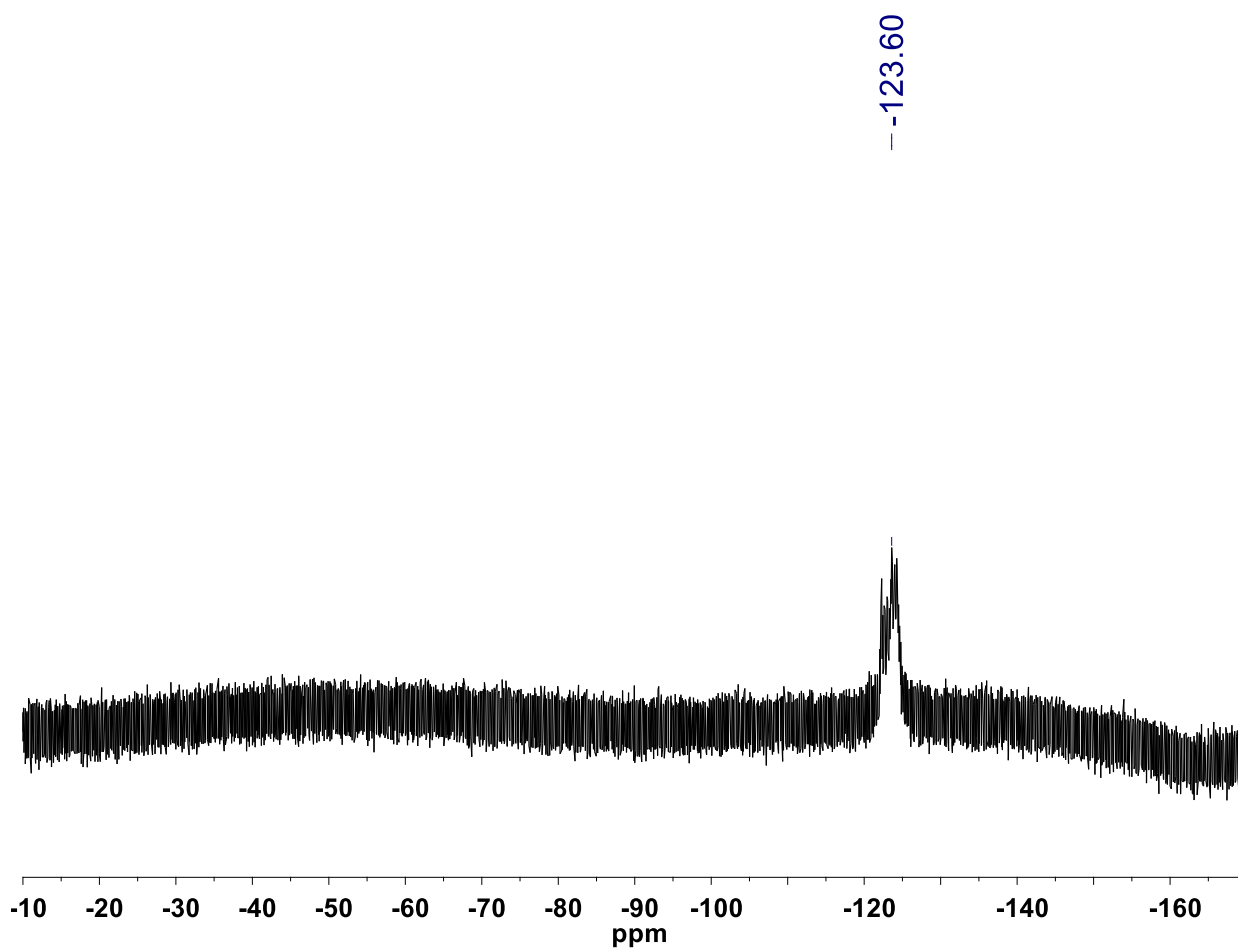

**Figure S19.** Compound **16** ( $^{19}\text{F}$  NMR).



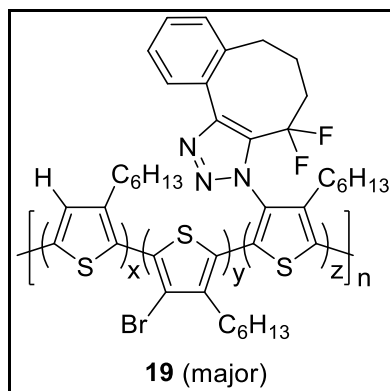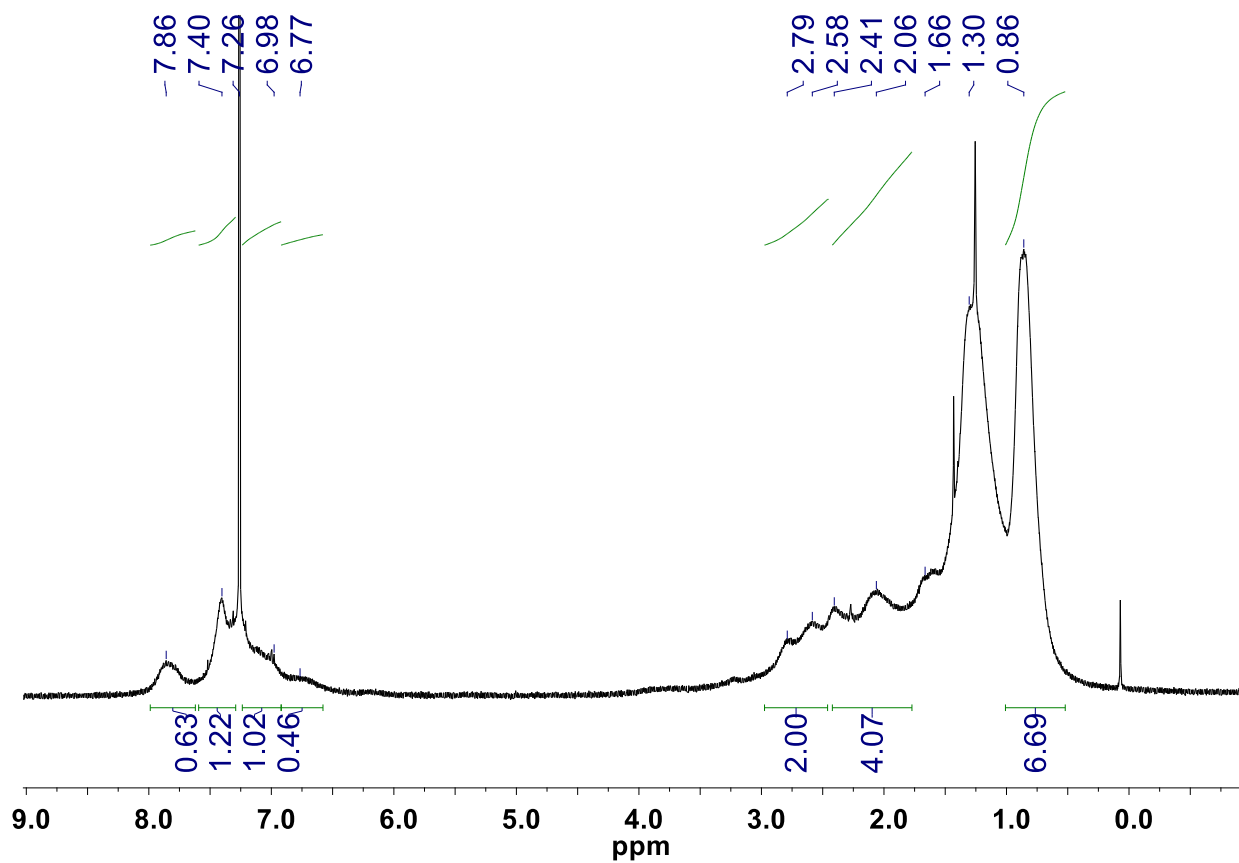

Figure S20. Compound 19.

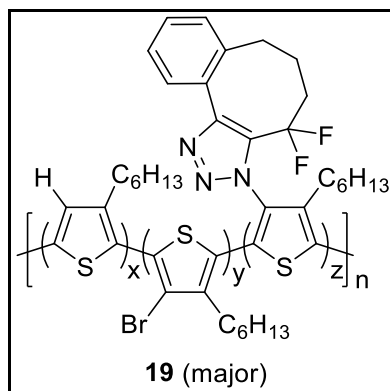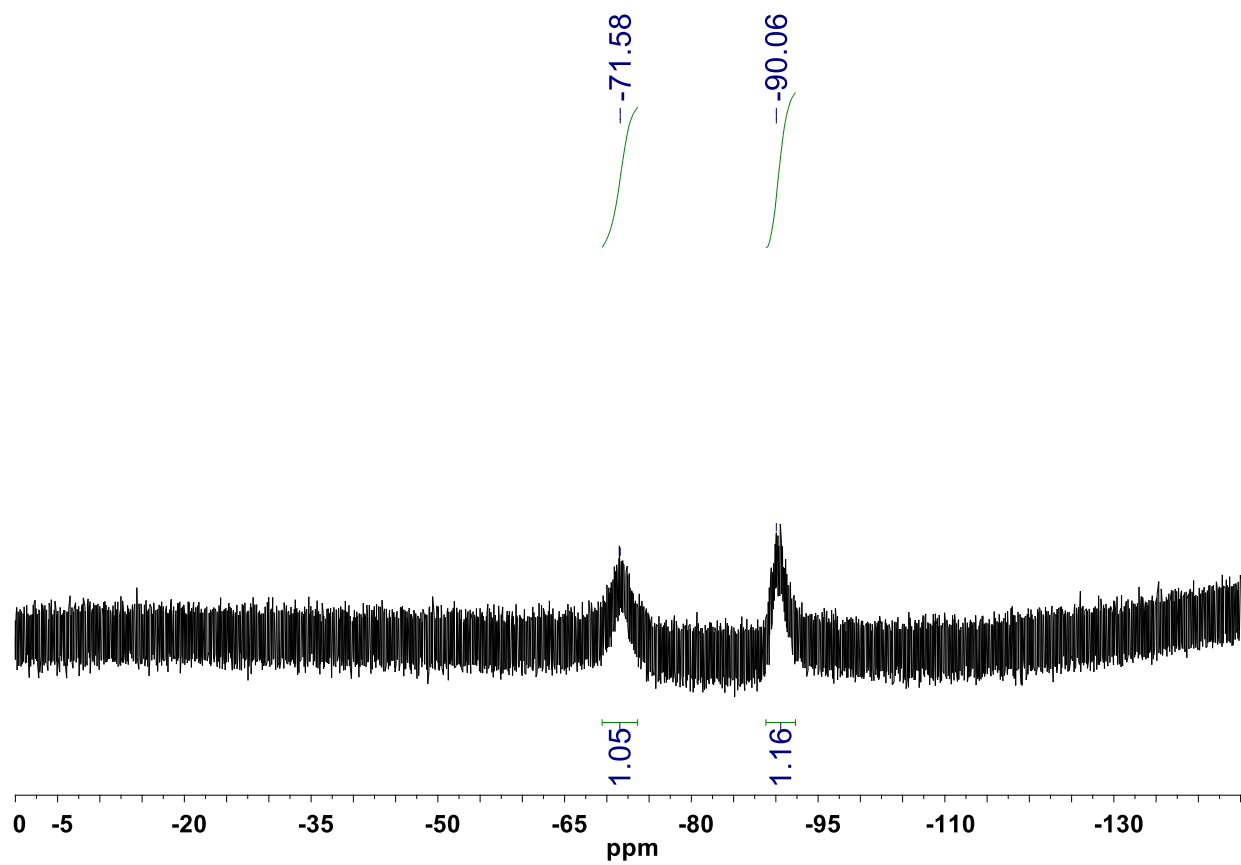

Figure S21. Compound 19.

## IR Spectra

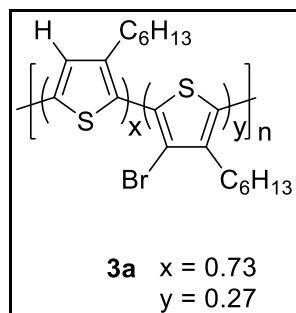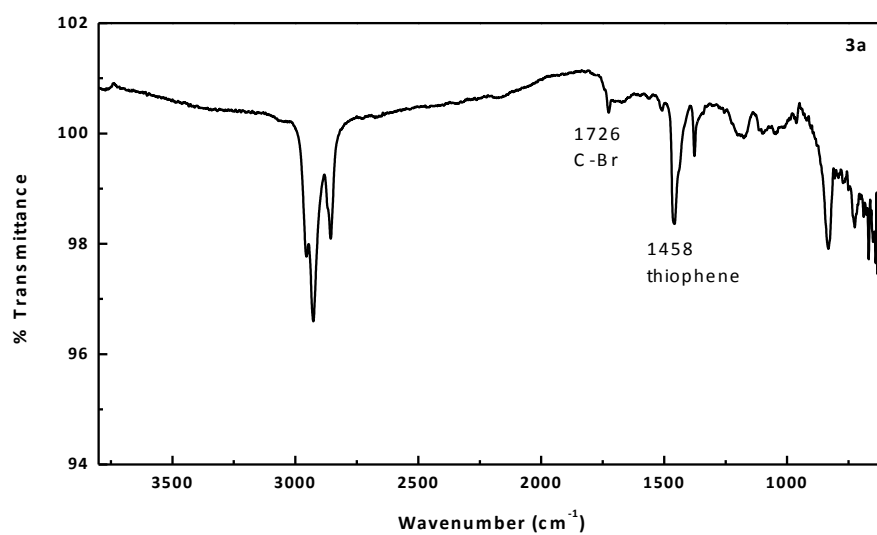

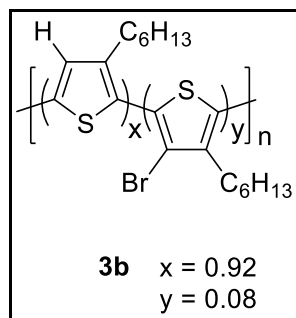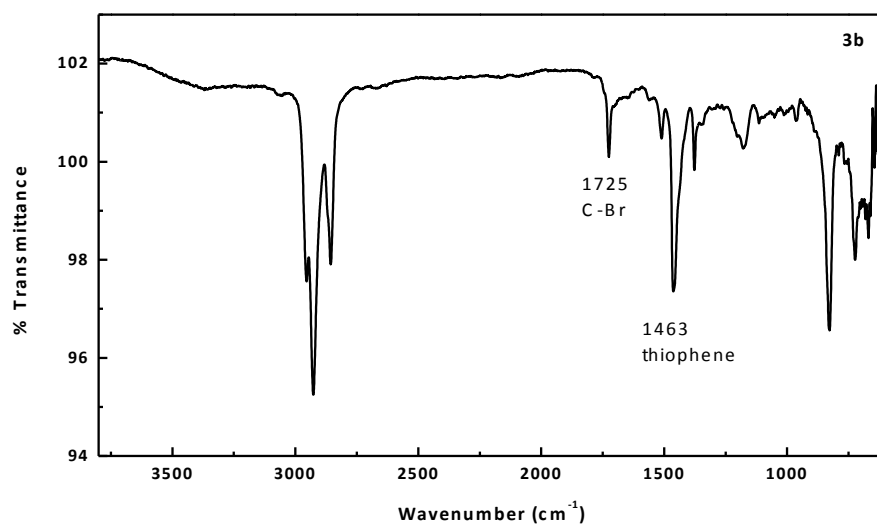

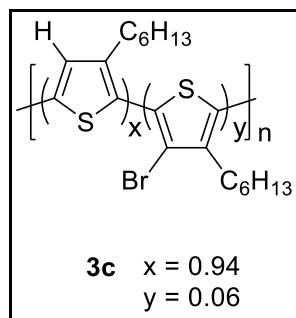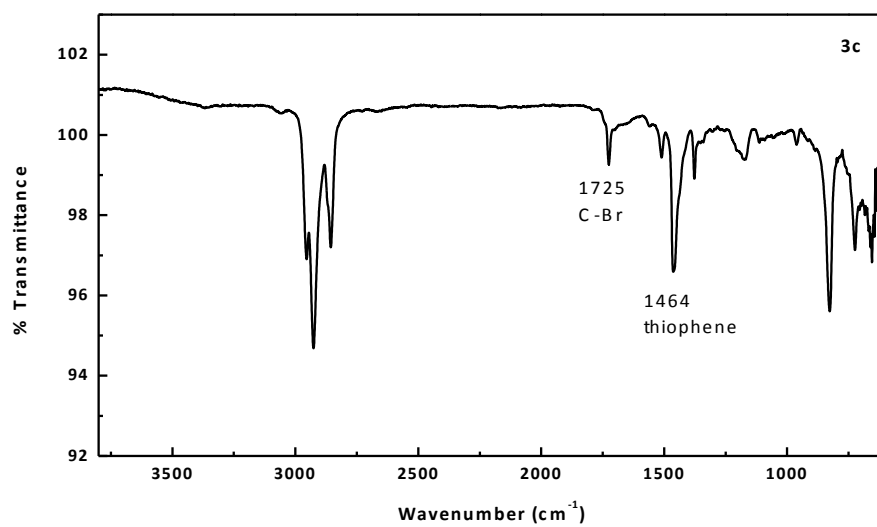

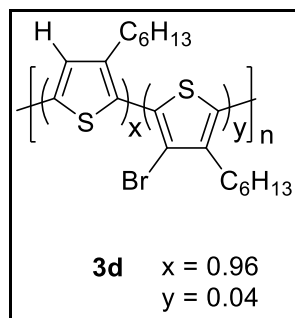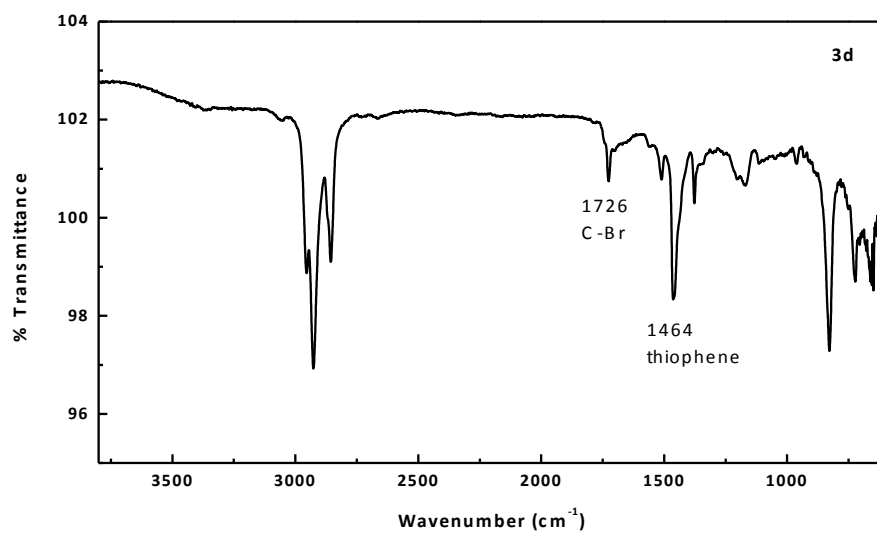

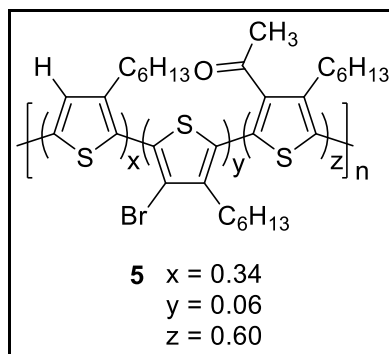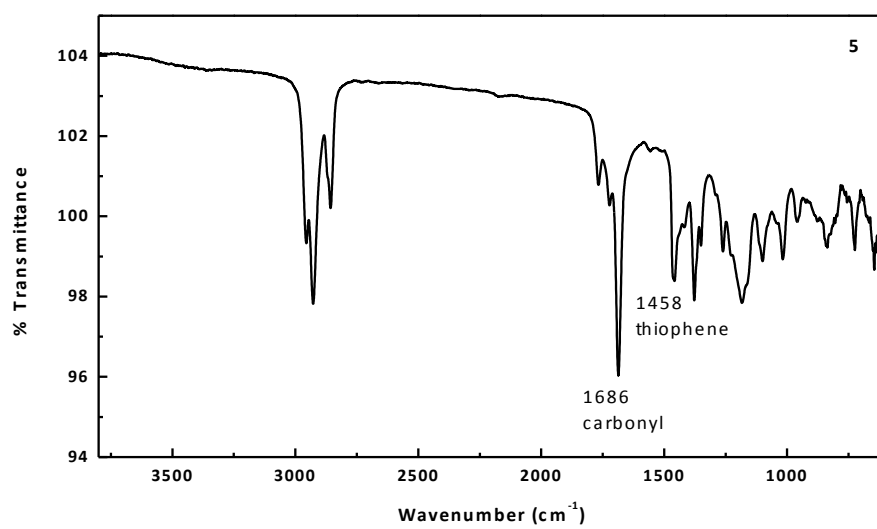

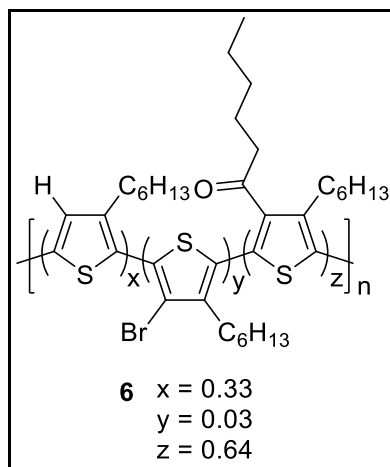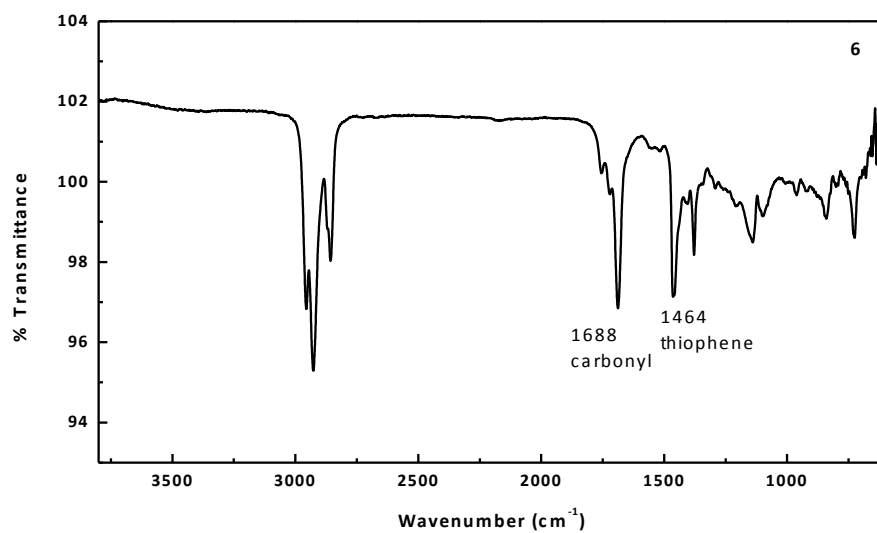



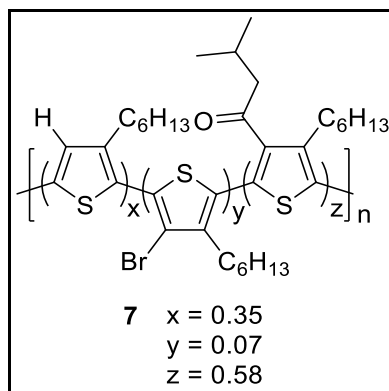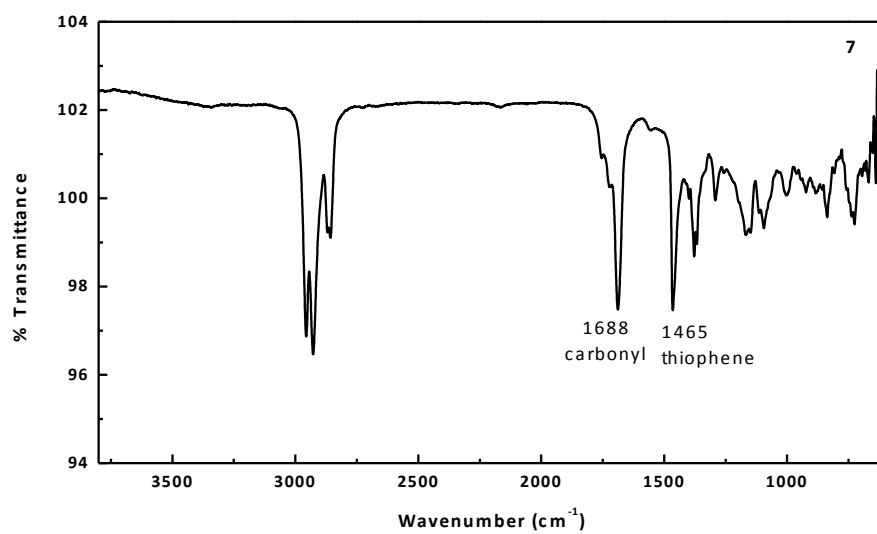

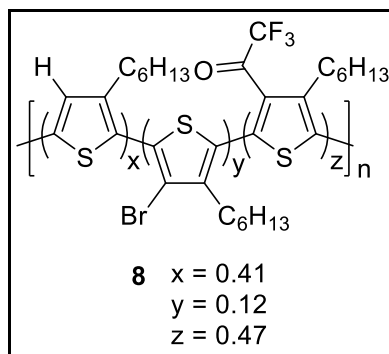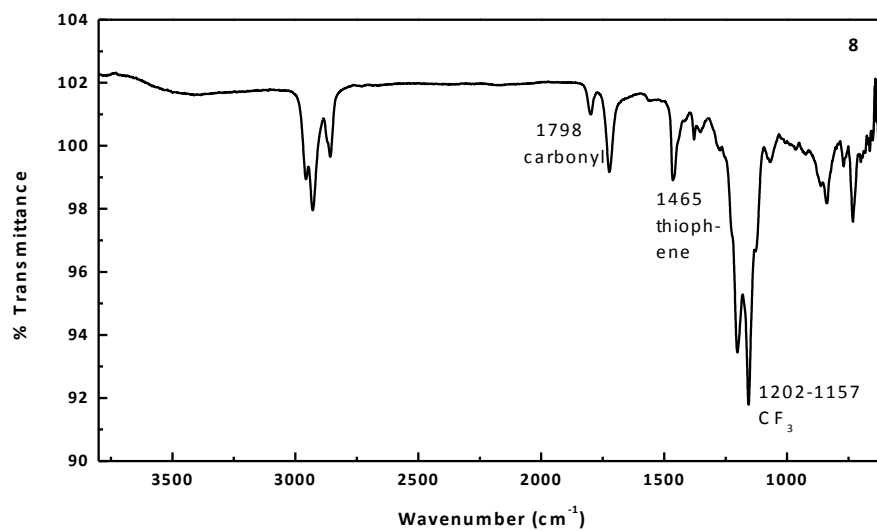

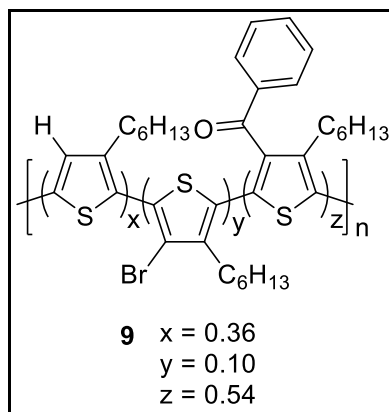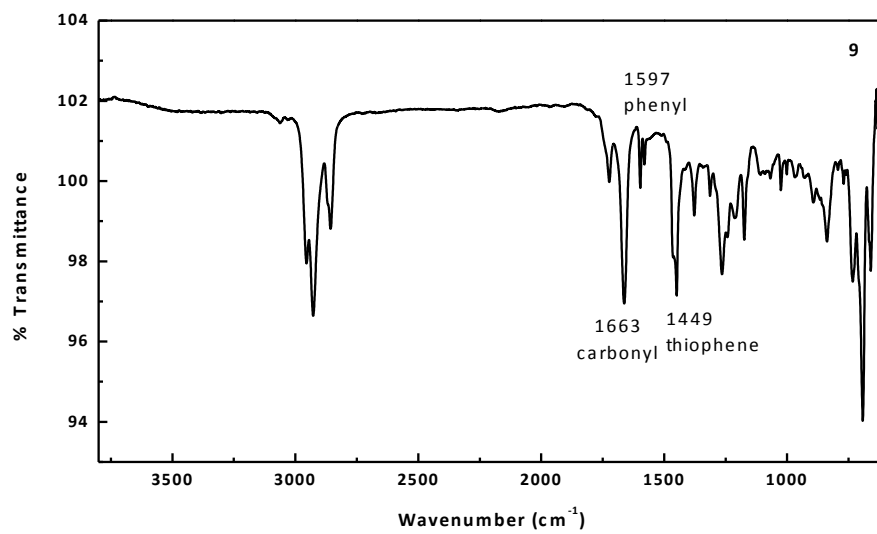

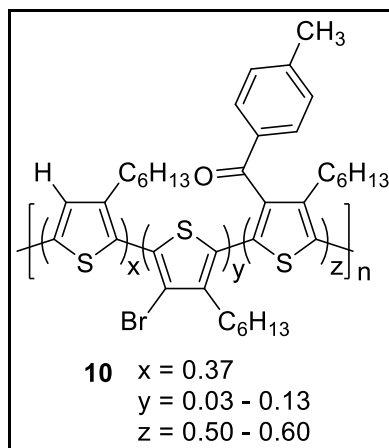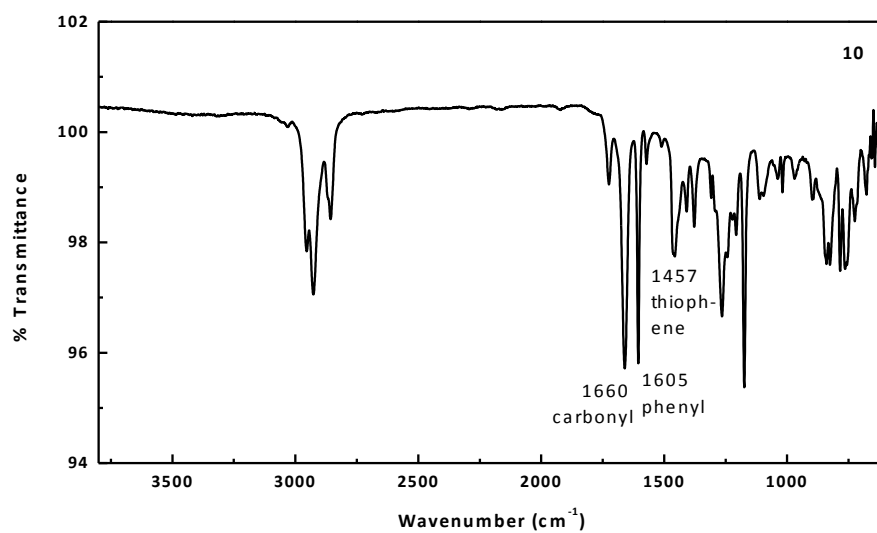

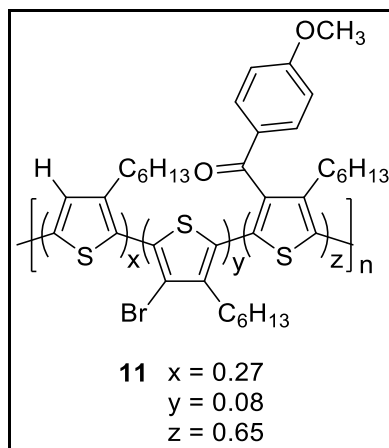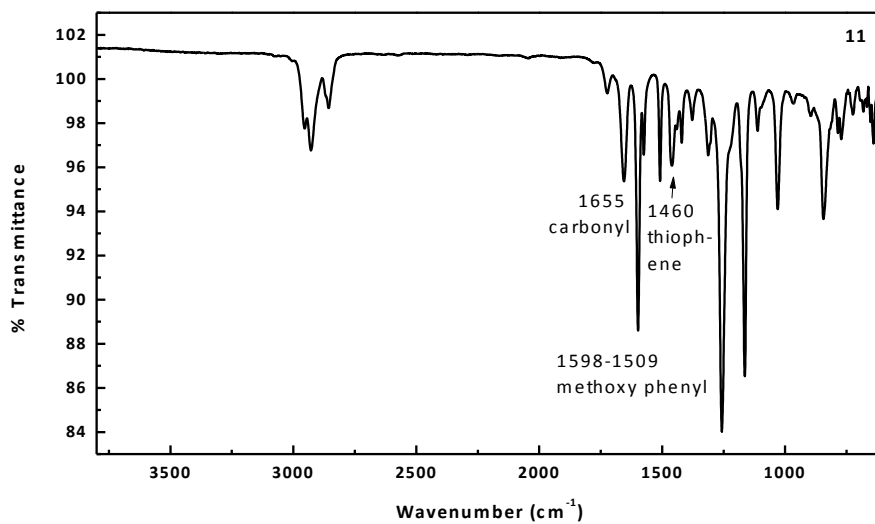

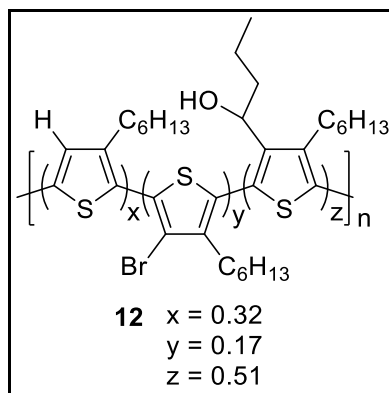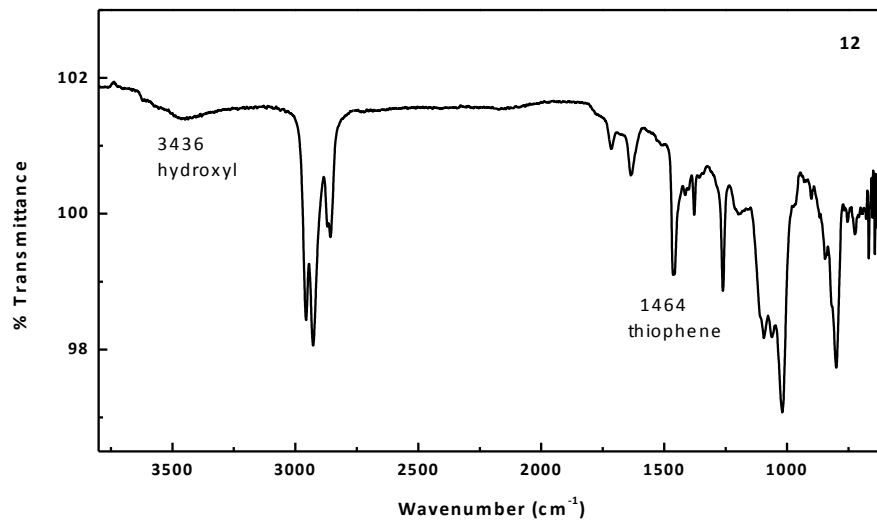

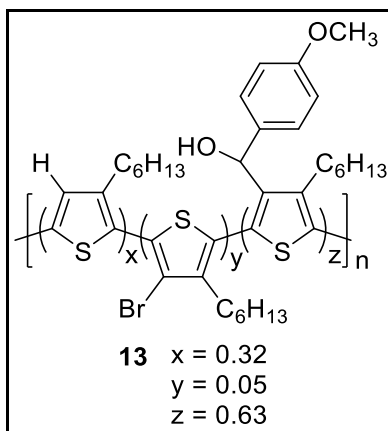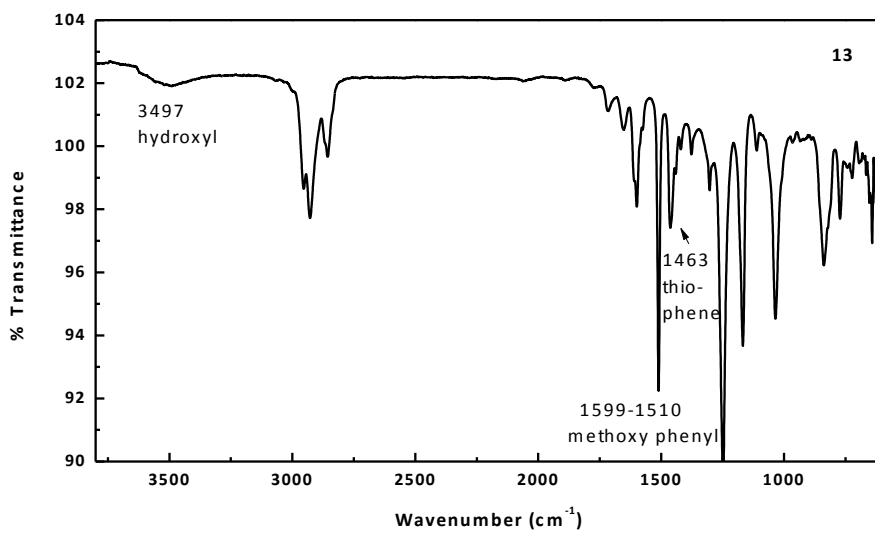

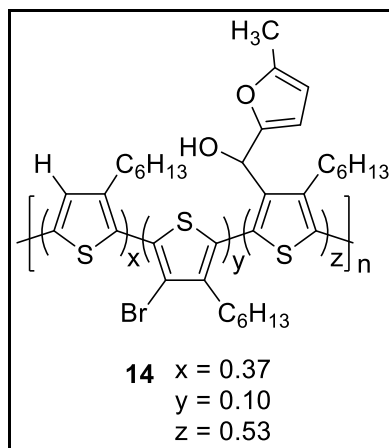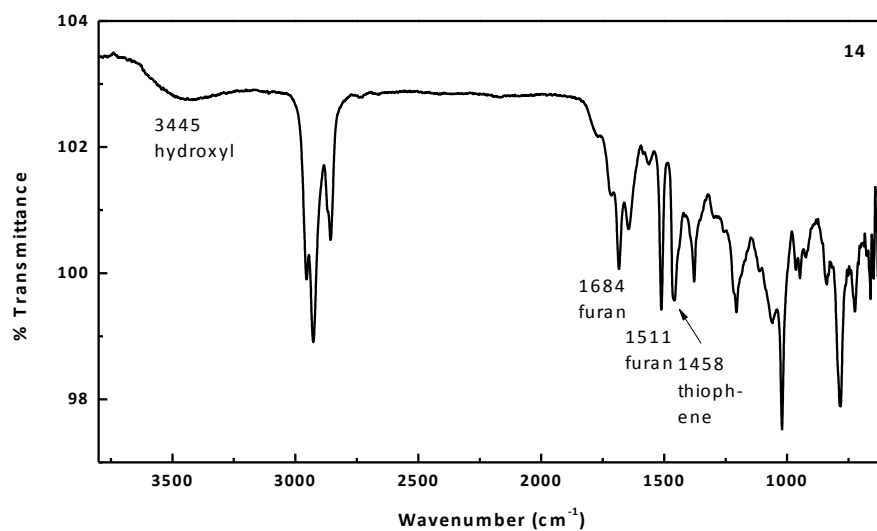



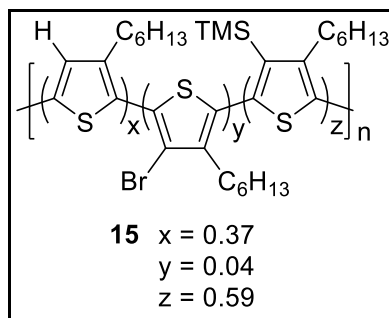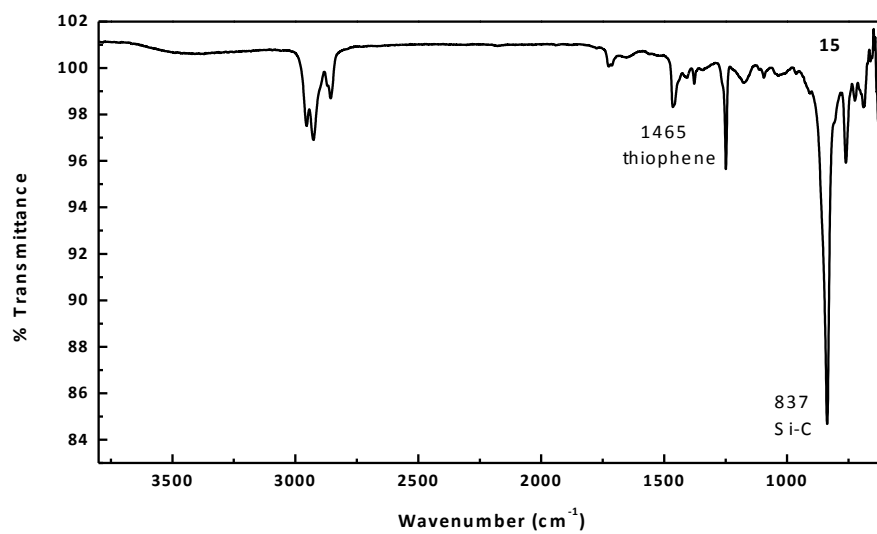

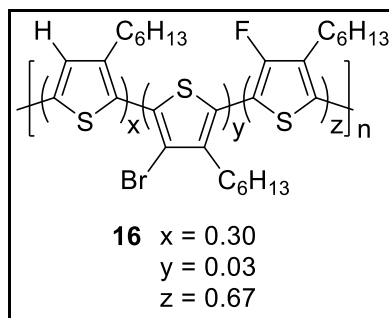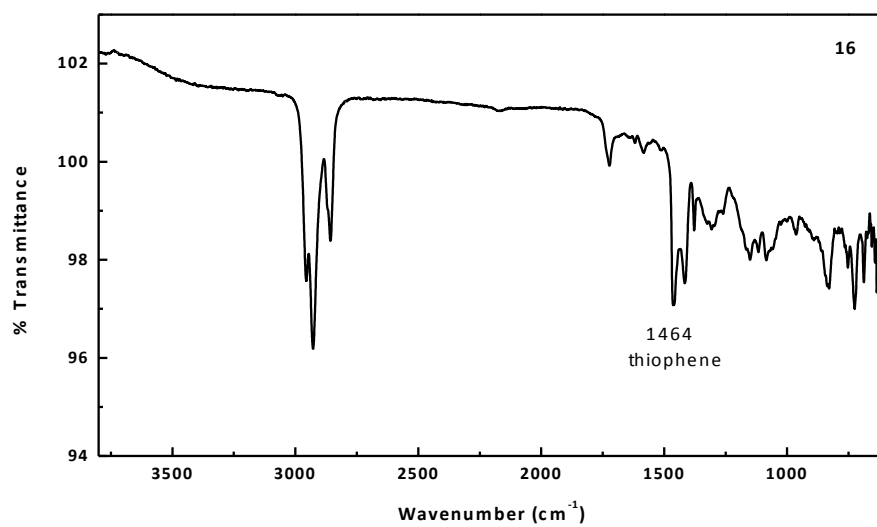

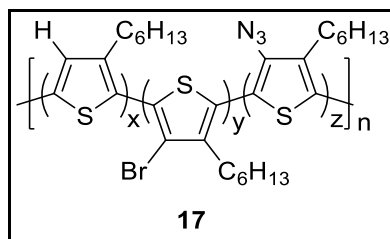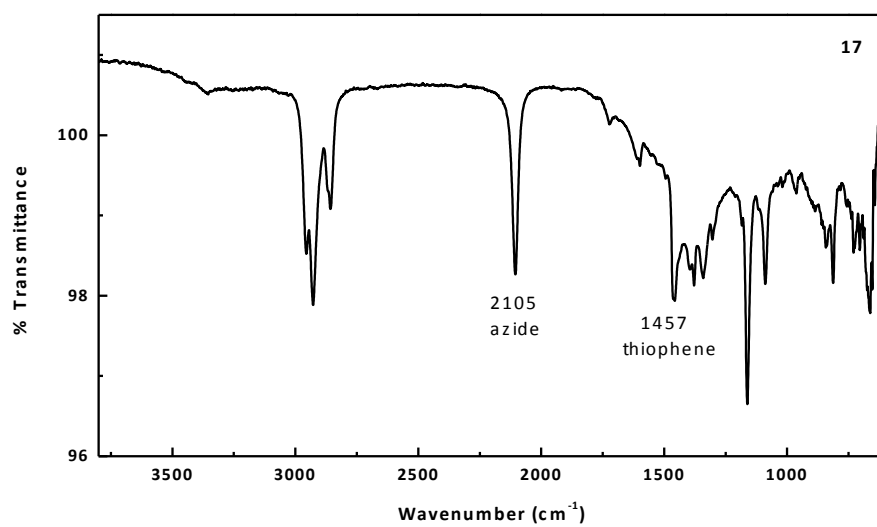

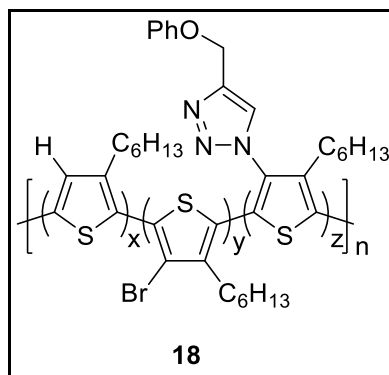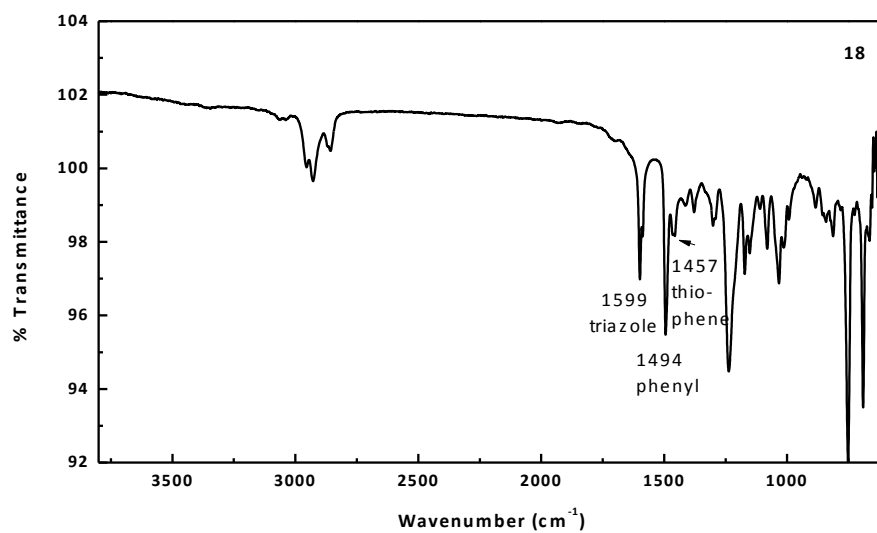

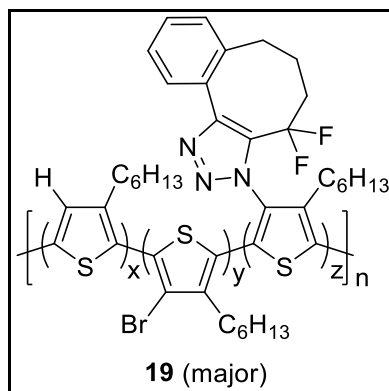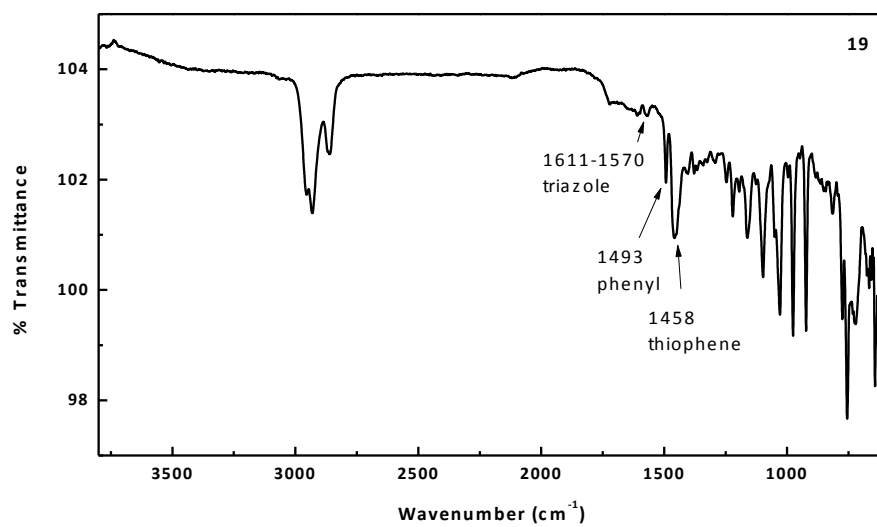

Supplement: ma5019044_si_001.pdf [file ma5019044_si_001.pdf]
